# Supplementary material for: Structural Variation and Uniformity among Tetraloop-Receptor Interactions and Other Loop-Helix Interactions in RNA Crystal Structures
Source: PubMed Central journal article supplement (PMC3494683; doi:10.1371/journal.pone.0049225), 2012-11-09

# A

Class I

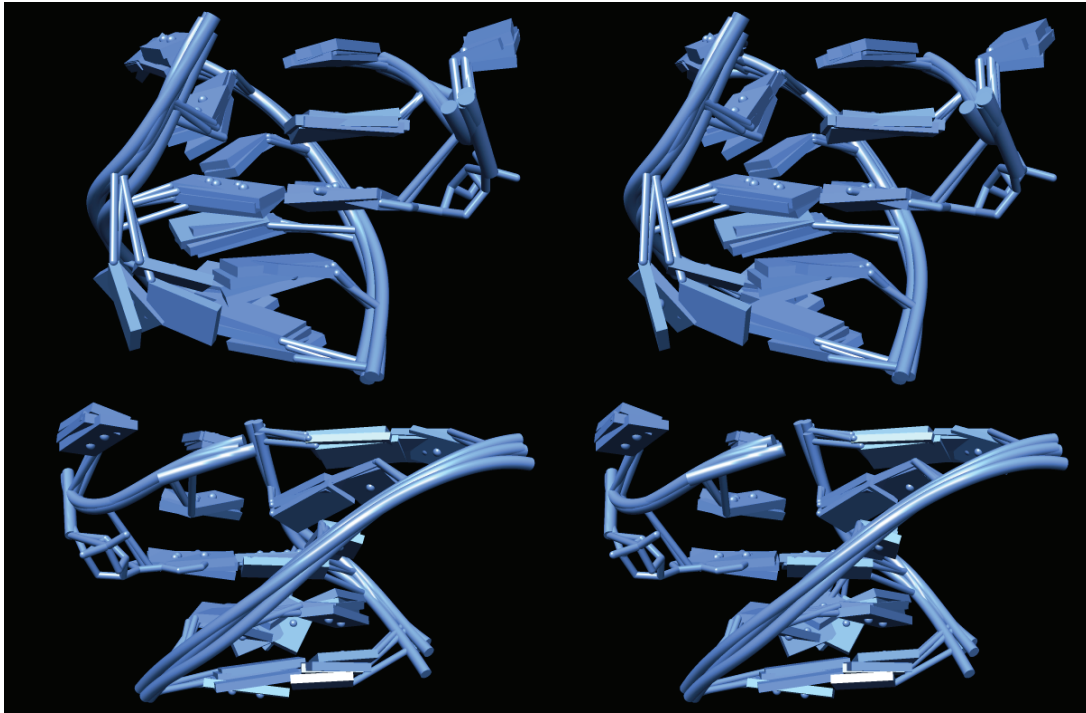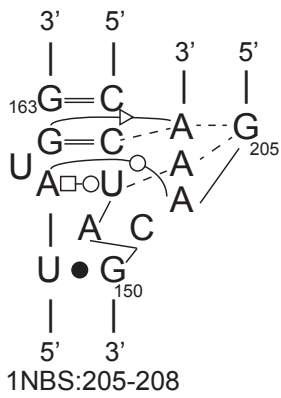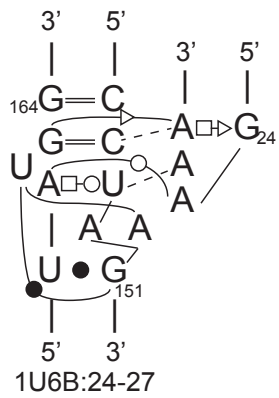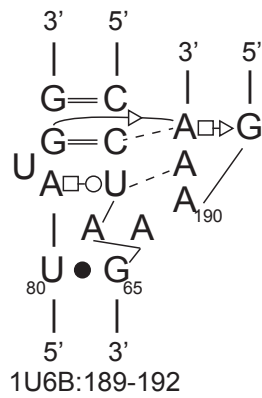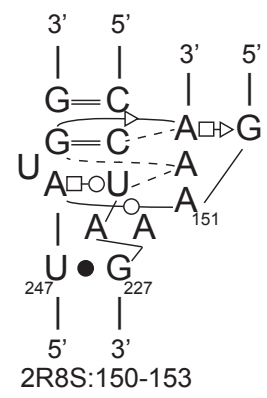

# B1 (Pt1 #1)

Class II/Subclass 1.1.1

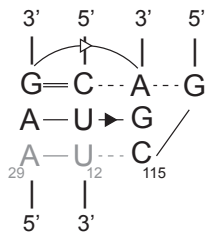

2Z75:114-117

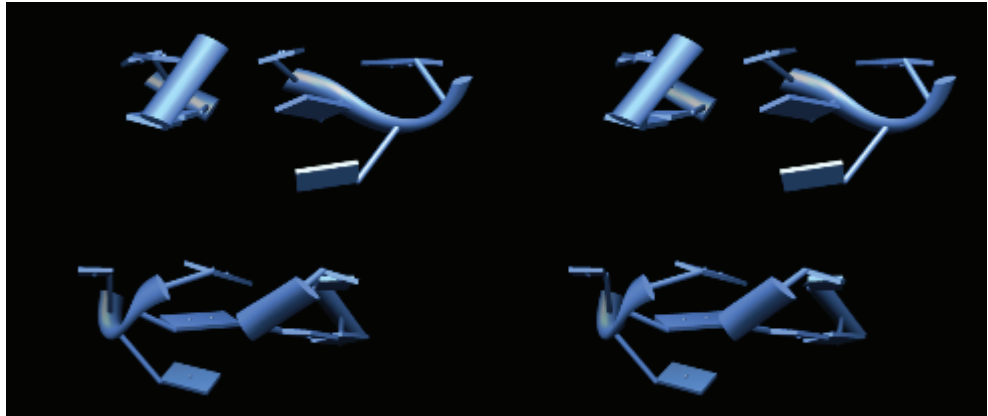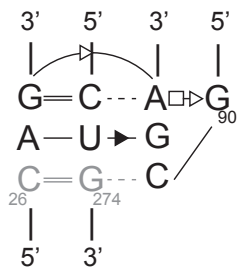

3IGI:90-93

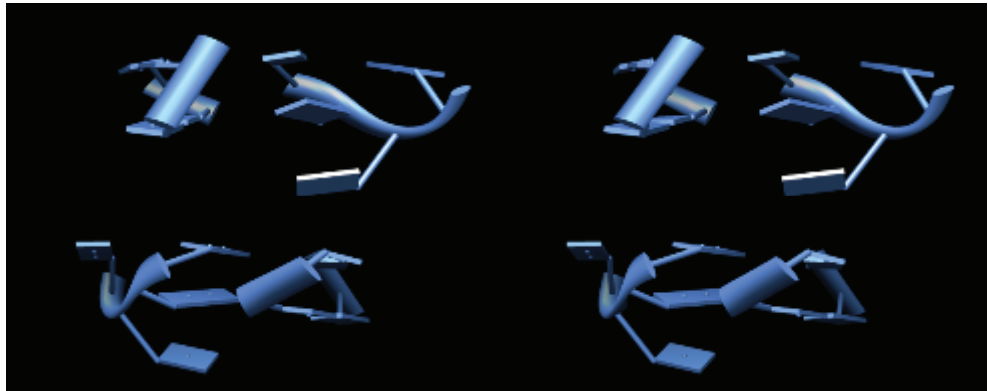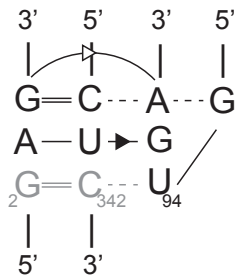

3OK7:93-96

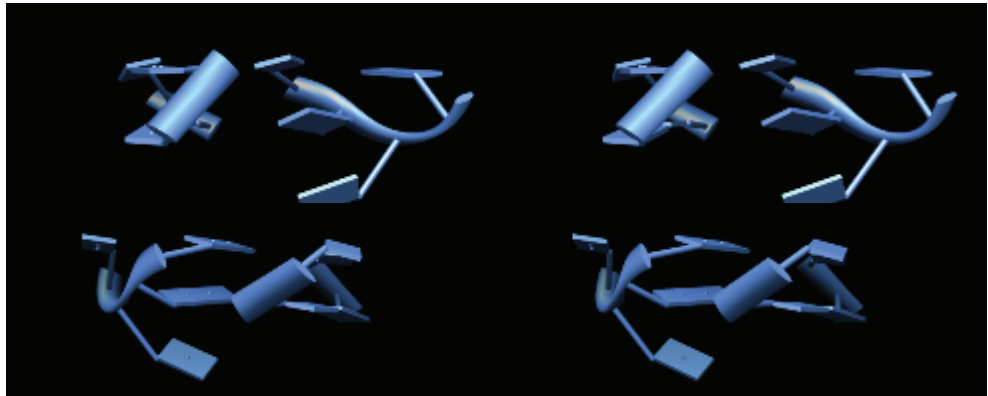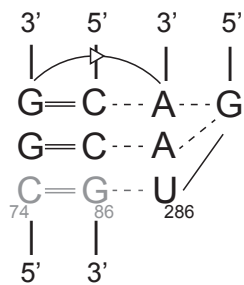

3OK7:285-288

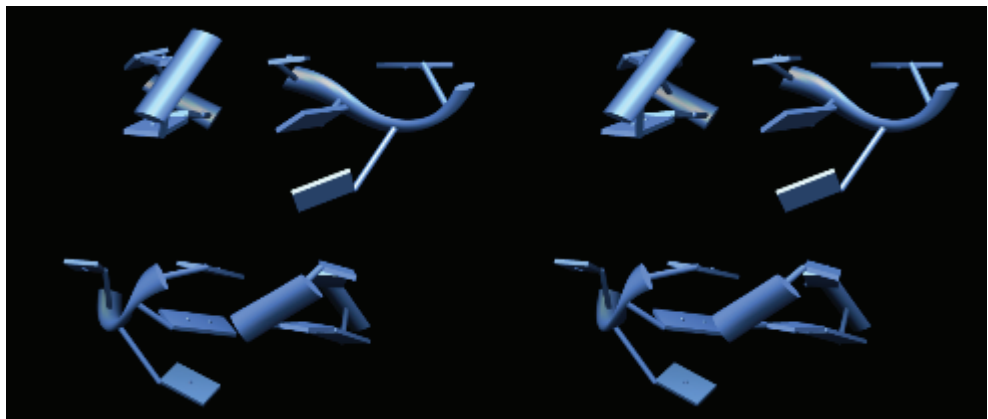

# B1 (Pt1 #2)

Class II/Subclass 1.1.1

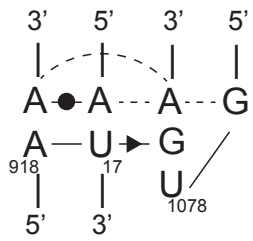

3OFO:1077-1080

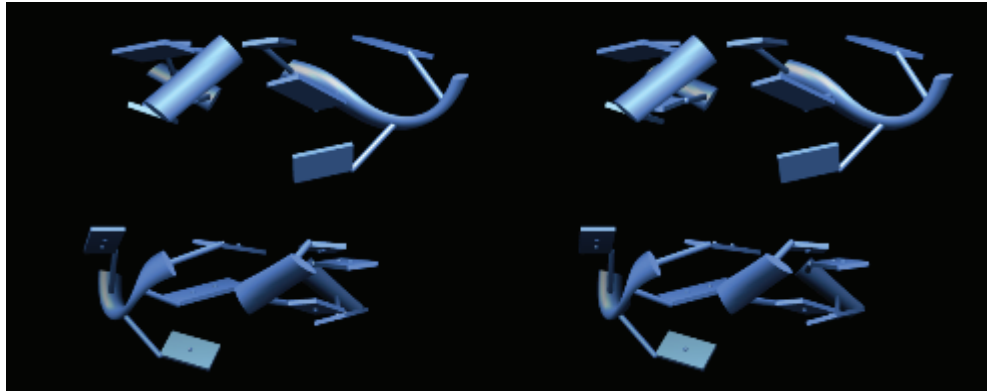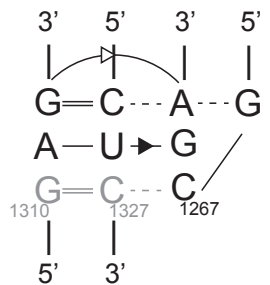

3OFO:1266-1269

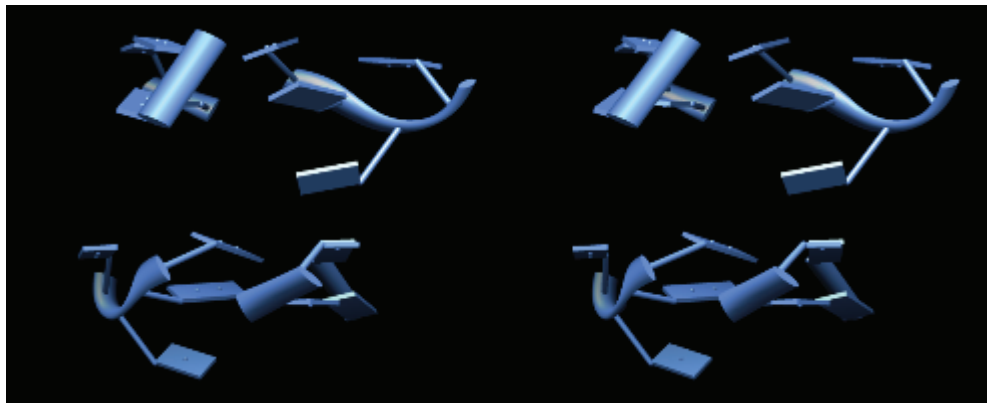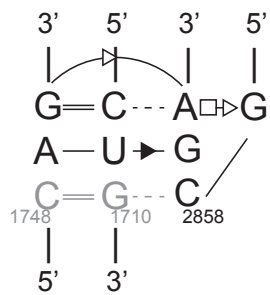

3OFR:2857-2860

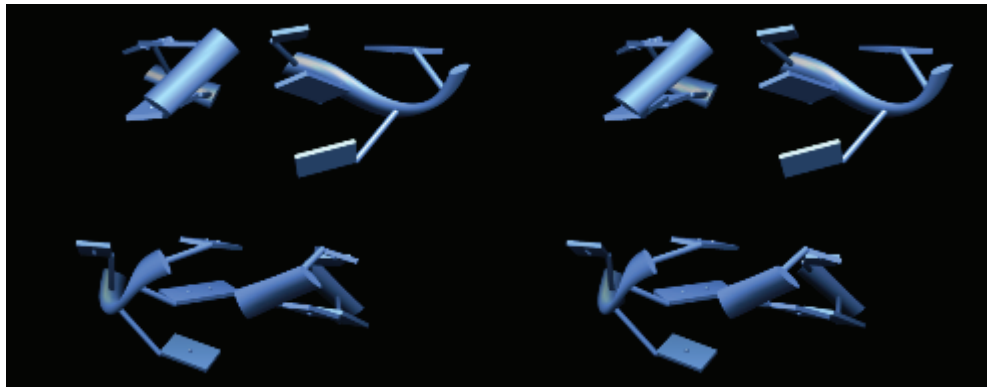

# B1 (Pt2)

Class II/Subclass 1.1.2

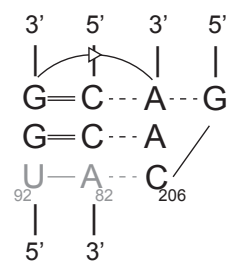

1U9S:205-208

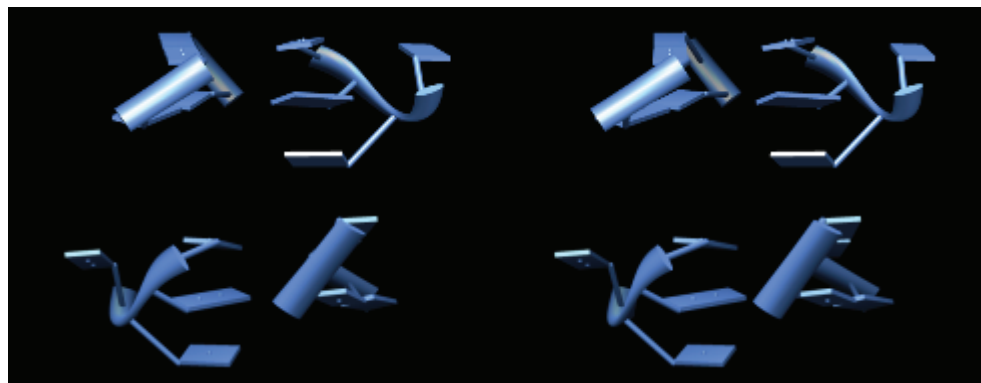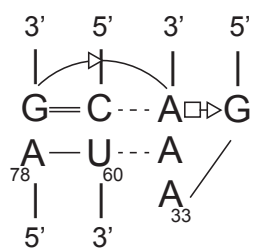

3MXH:32-35

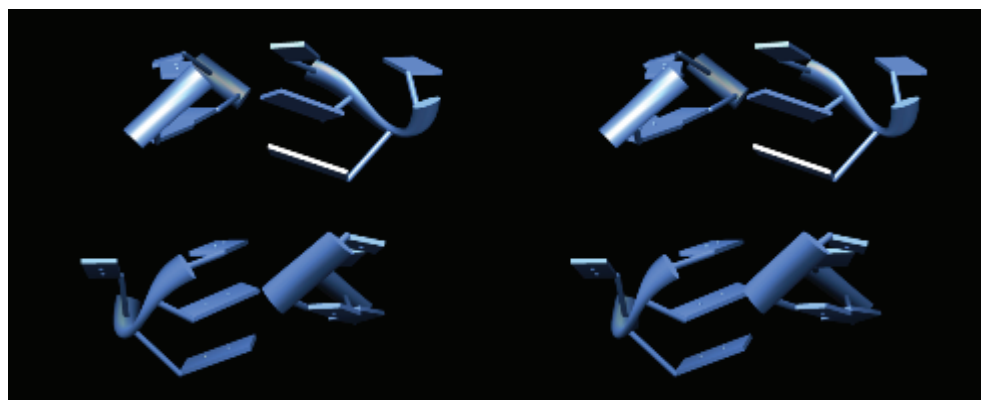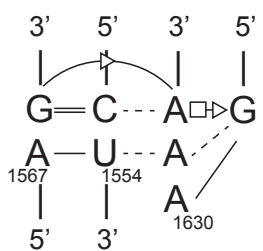

1VQO:1629-1632

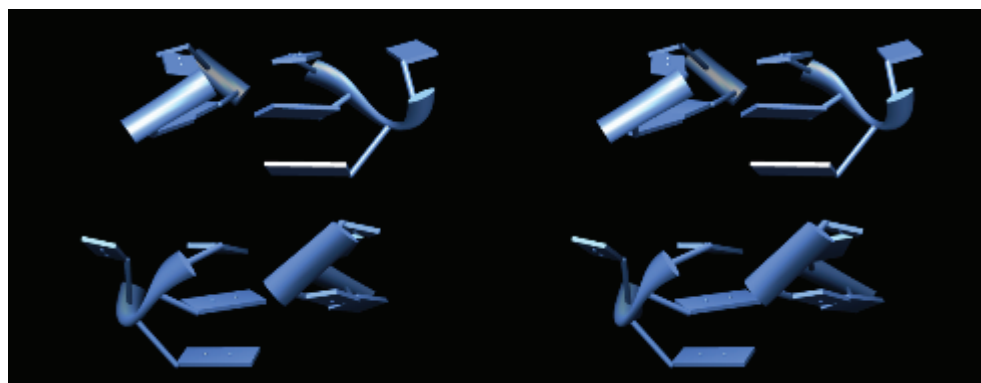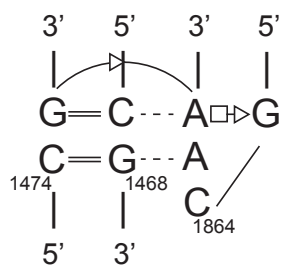

1VQO:1863-1866

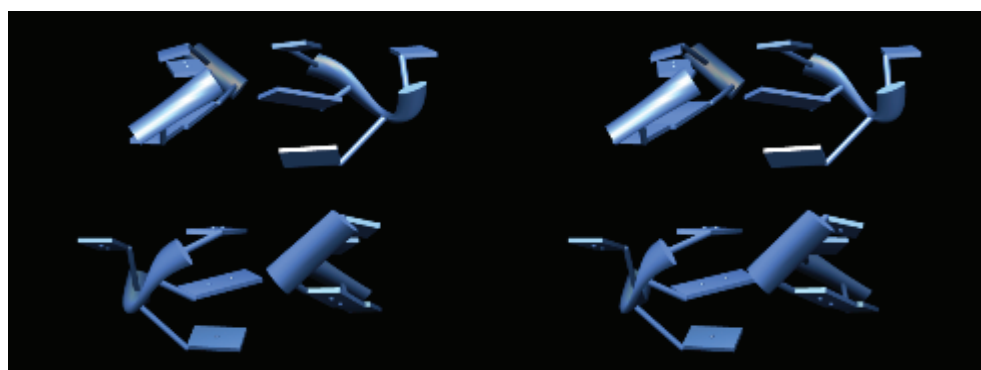

# B1 (Pt3 #1)

Class II/Subclass 1.1  
(Individual)

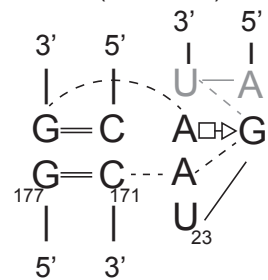

1Y0Q:22-25

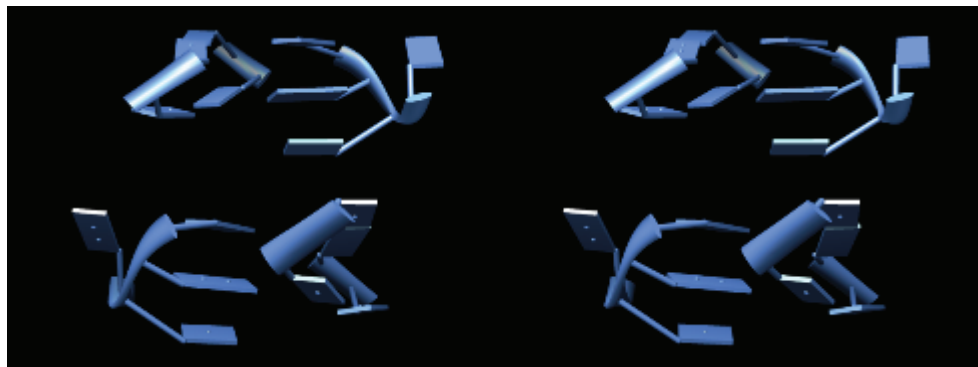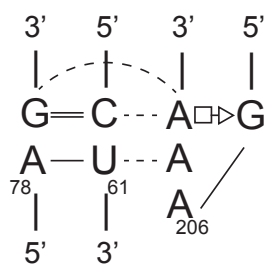

1Y0Q:205-208

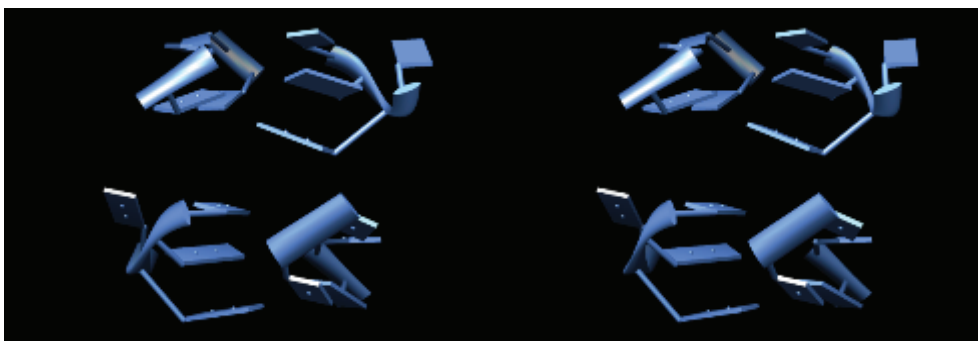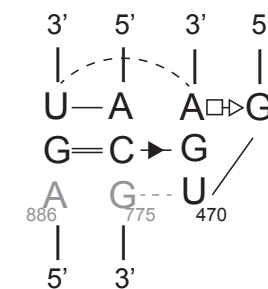

1VQO:469-472

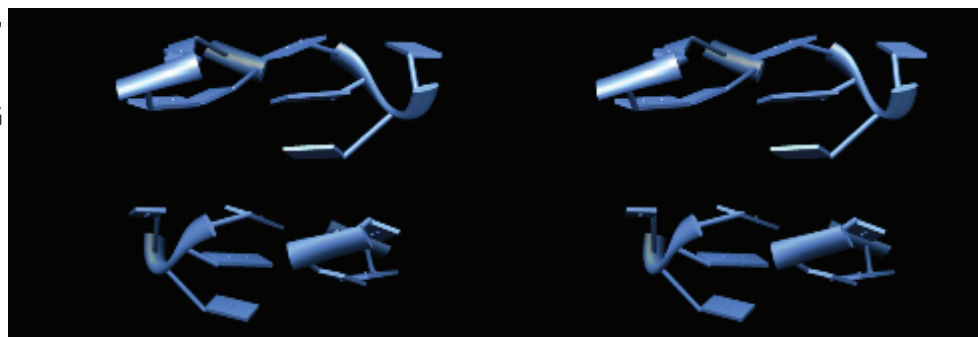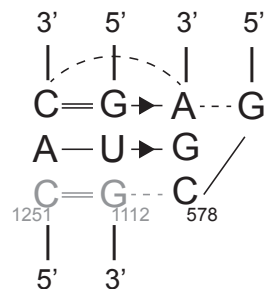

1VQO:577-580

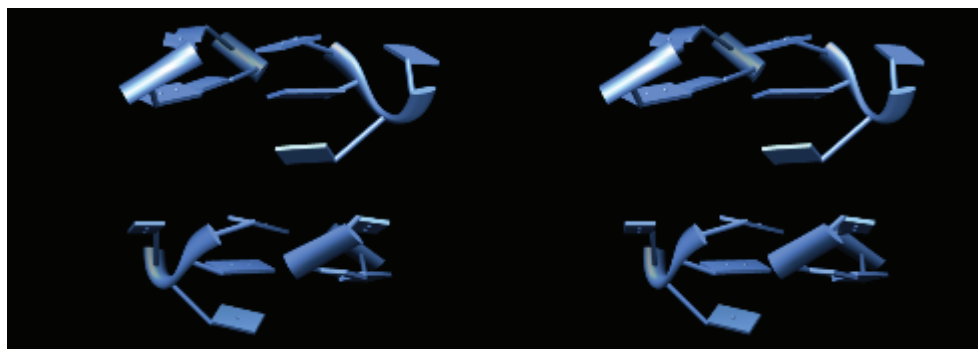

# B1 (Pt3 #2)

Class II/Subclass 1.1  
(Individual)

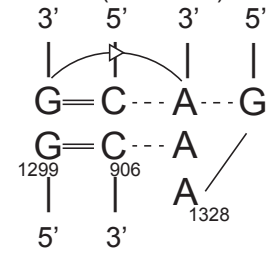

1VQO:1327-1330

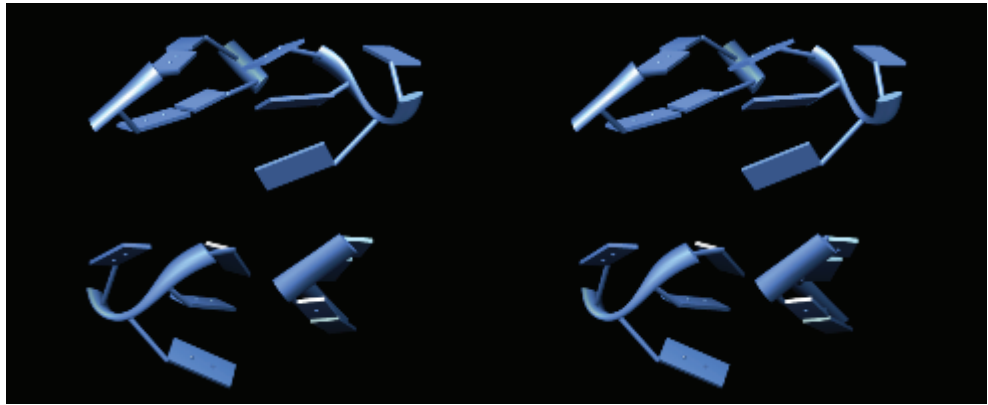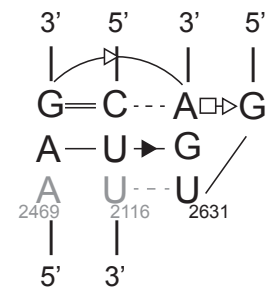

1VQO:2630-2633

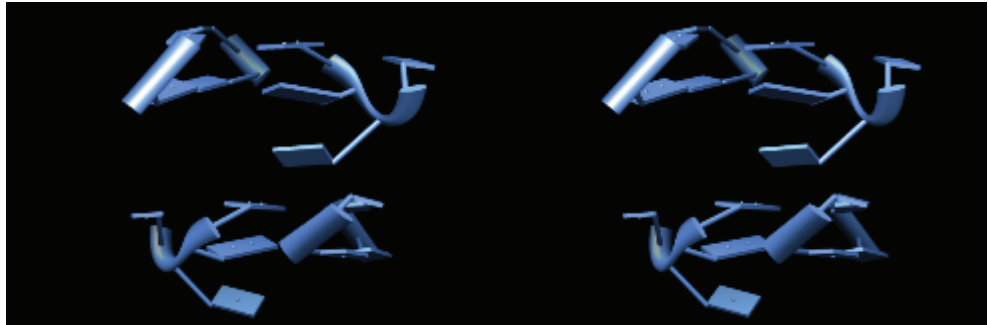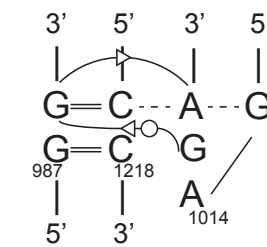

3OFO:1013-1016

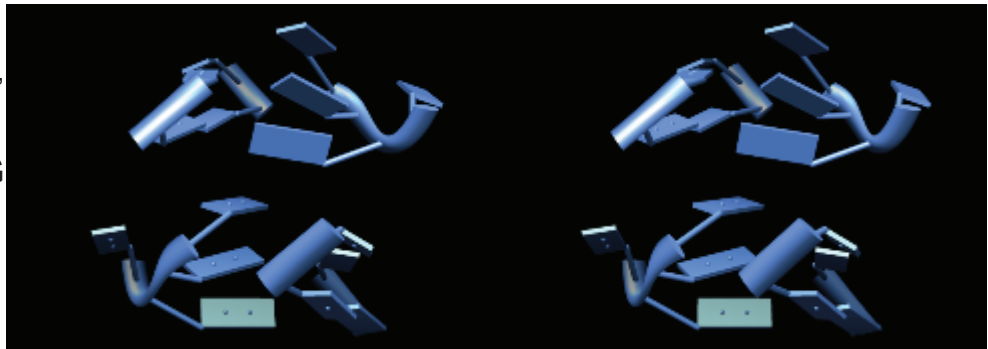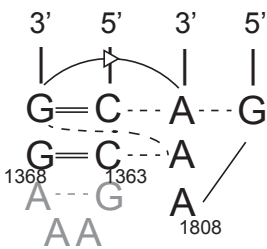

3OFR:1807-1810

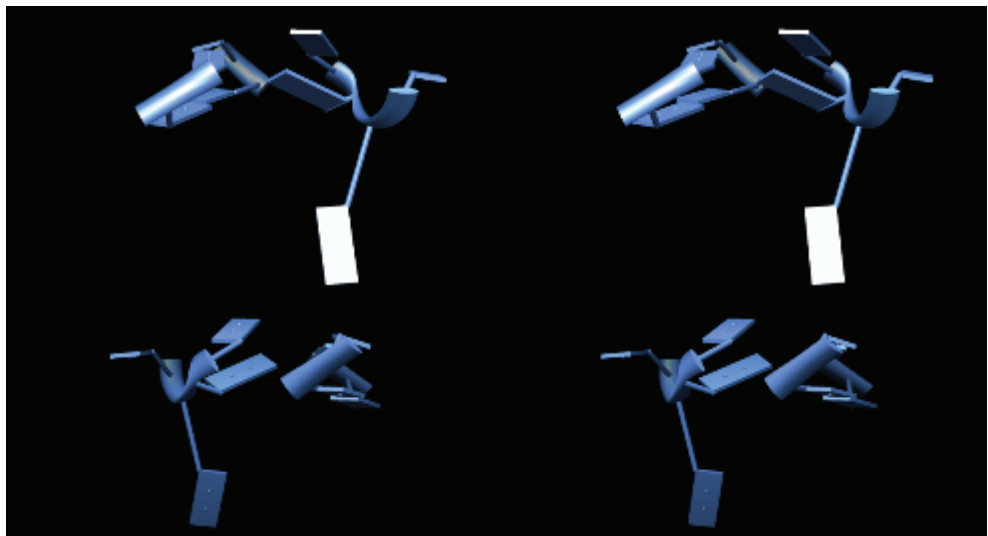

# B1 (Pt4)

Class II/Subclass 1  
(Individual)

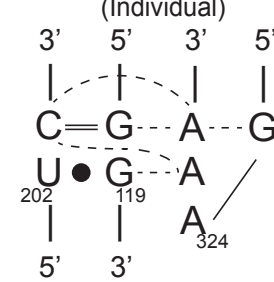

1X8W:323-326

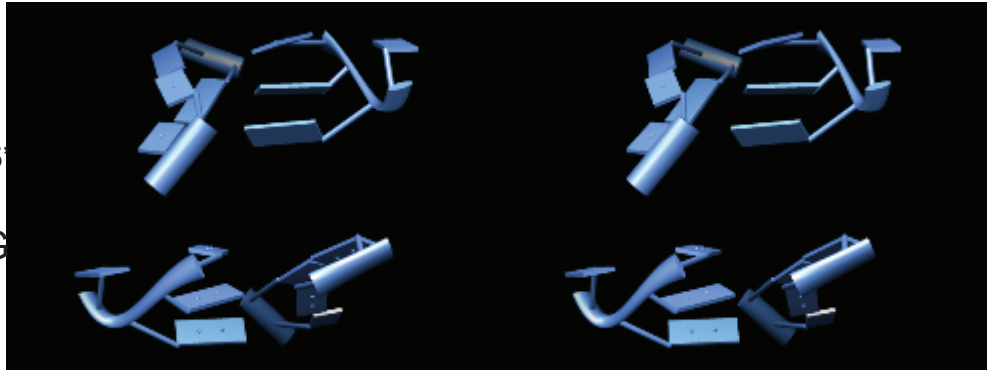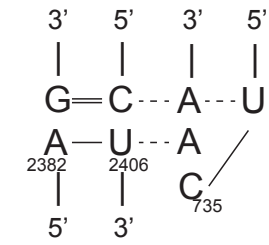

1VQO:734-737

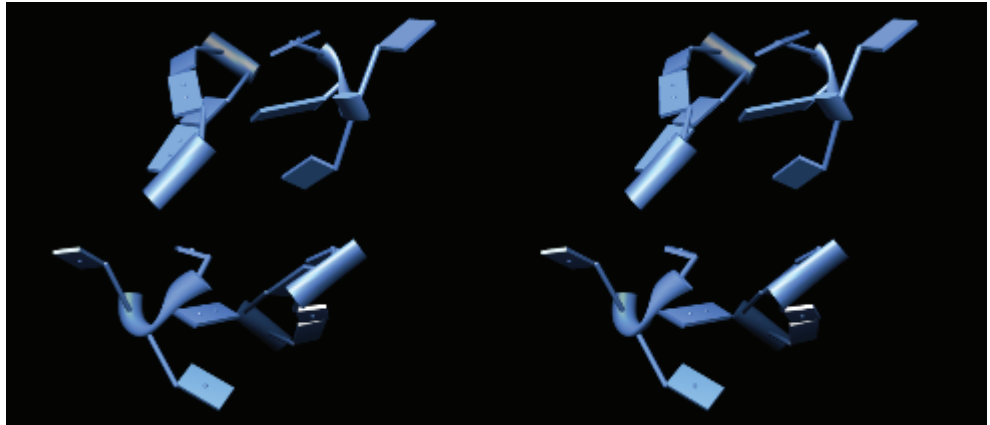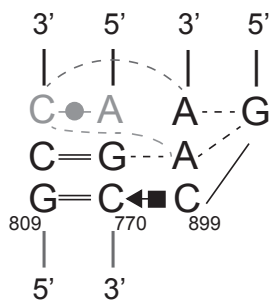

3OFO:898-901

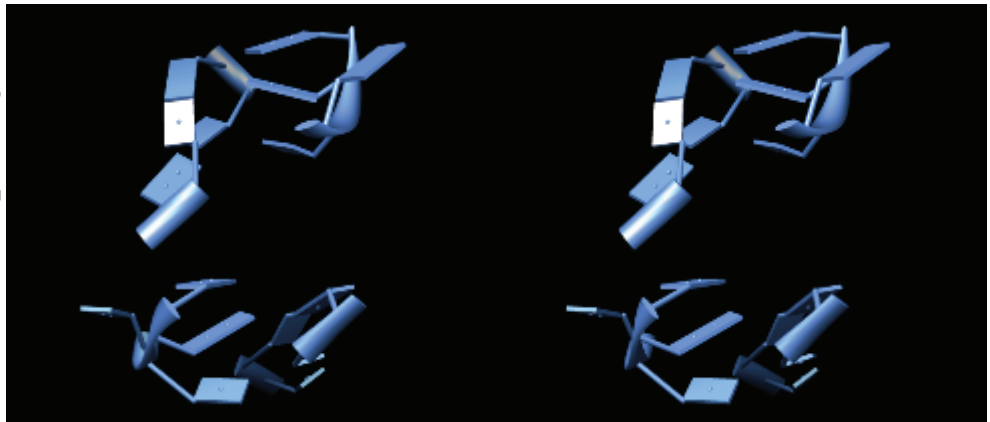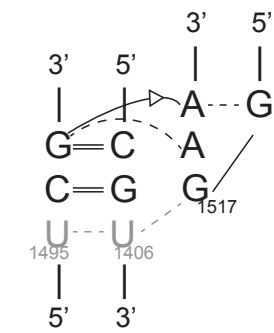

3OFO:1516-1519

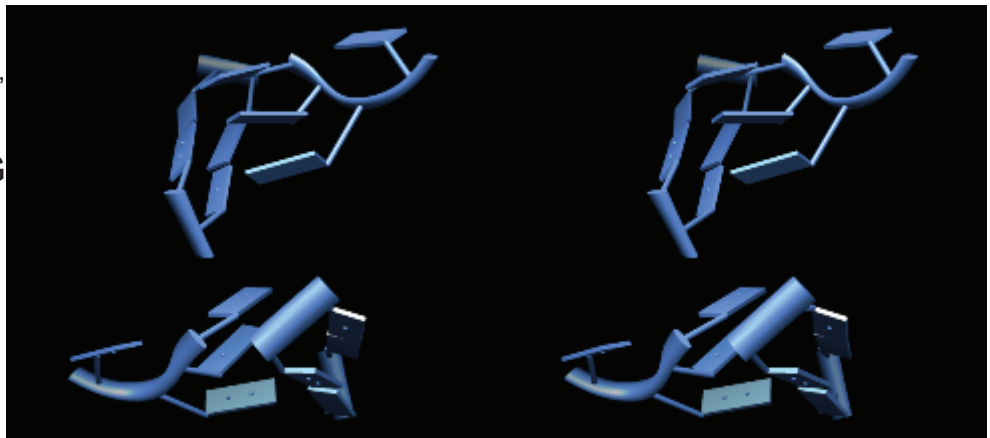



# B1 (Pt5 #1)

Class II/Subclass1 (NTL)

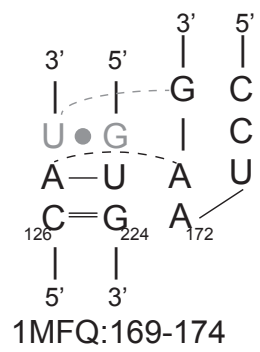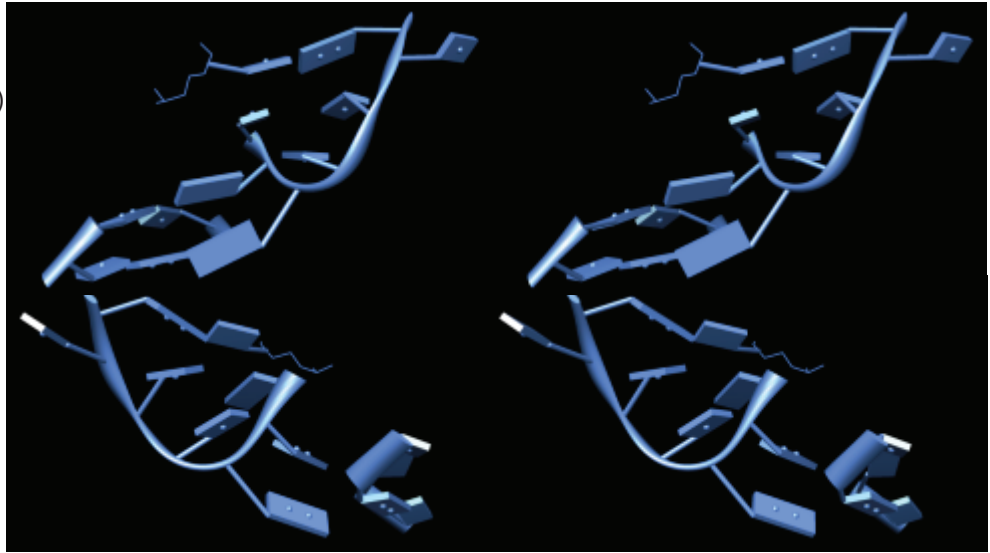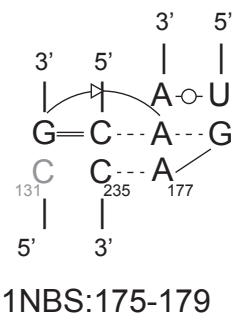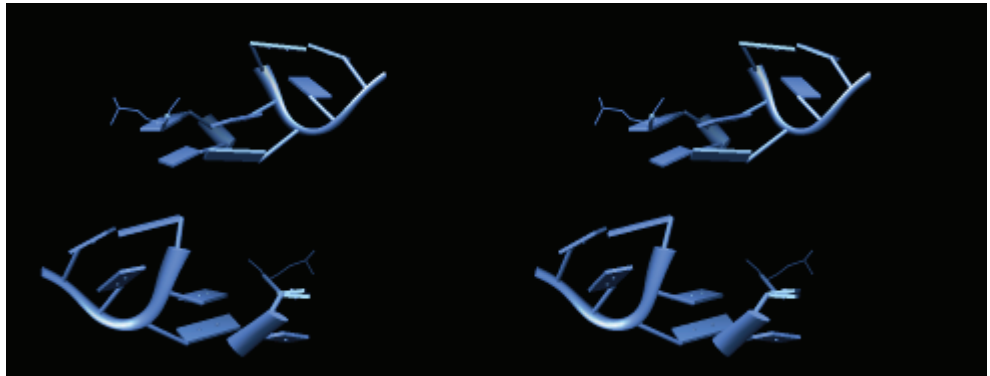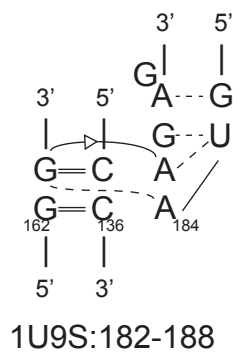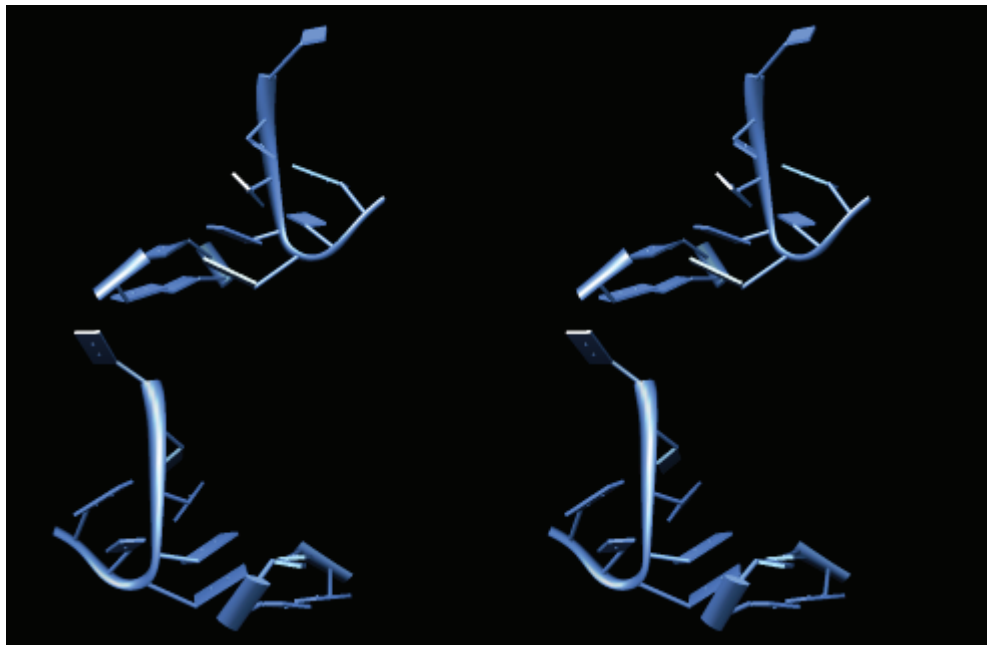



# B1 (Pt5 #2)

Class II/Subclass1 (NTL)

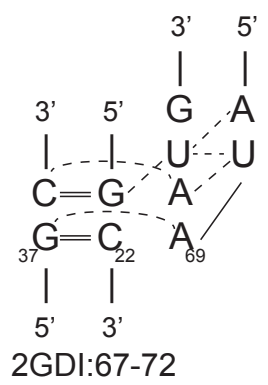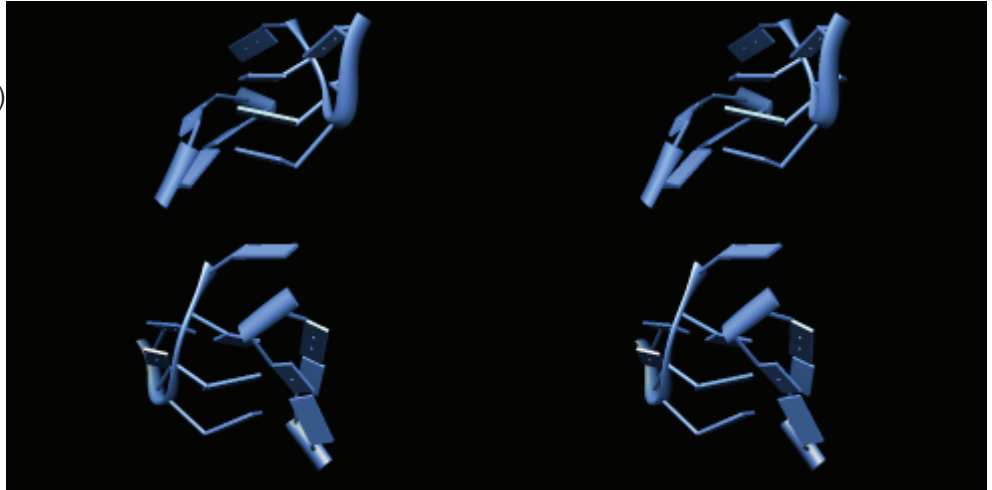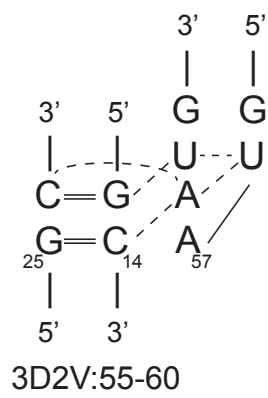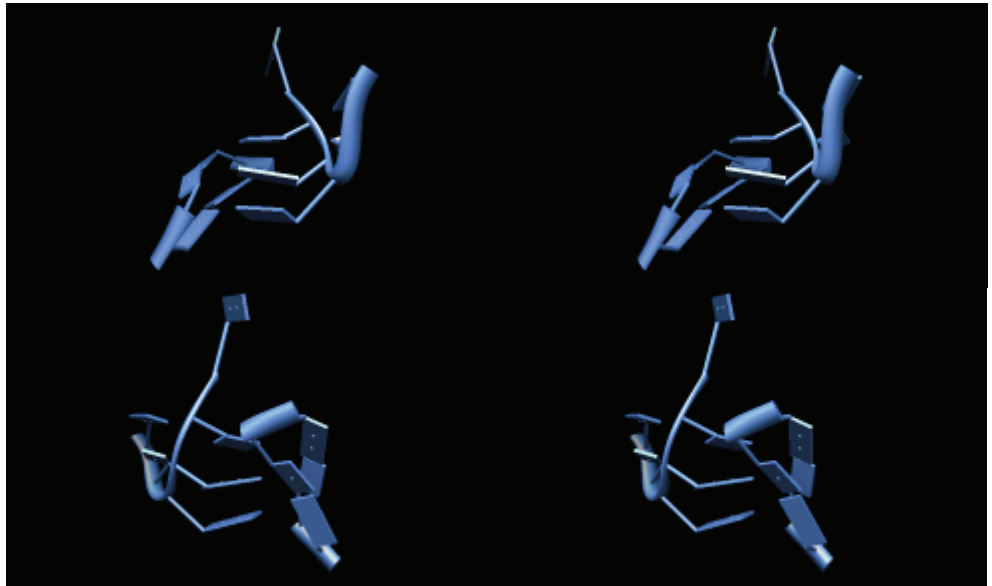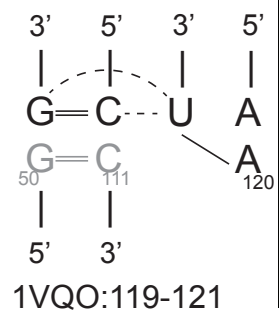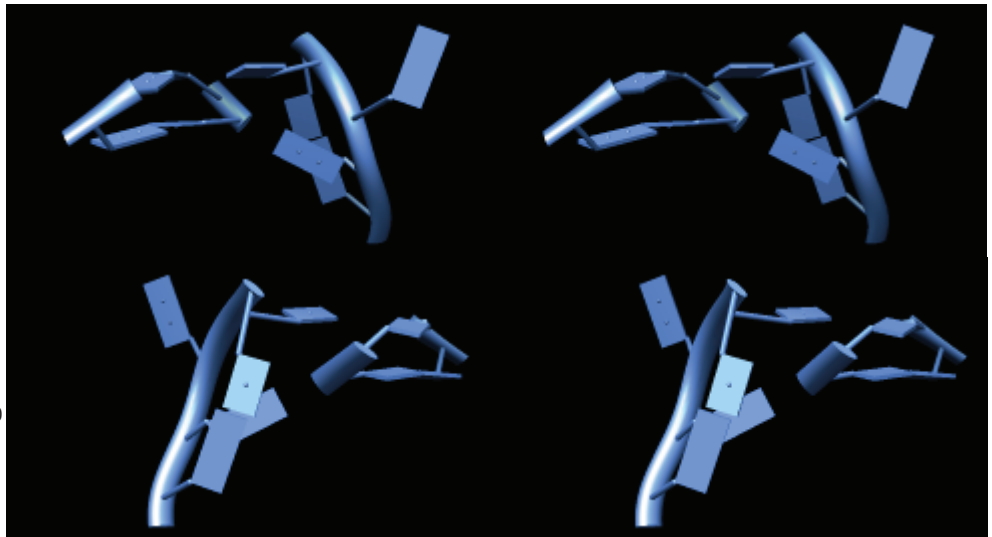

# B1 (Pt5 #3)

Class II/Subclass1 (NTL)

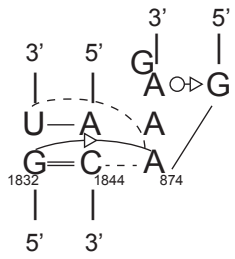

1VQO:873-877

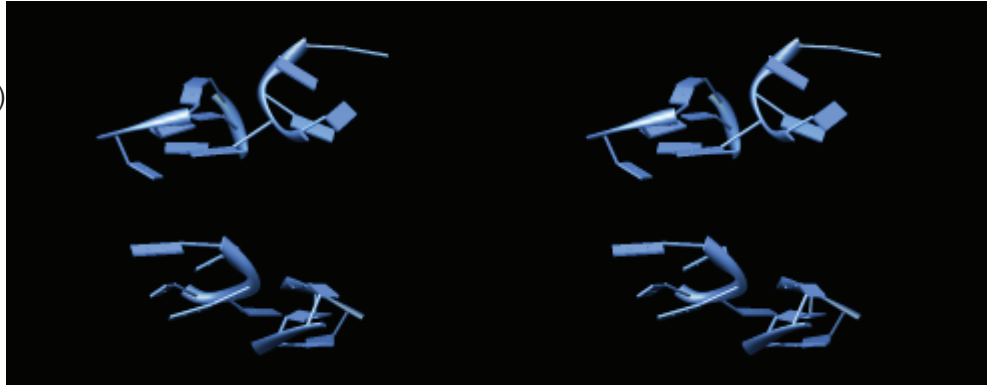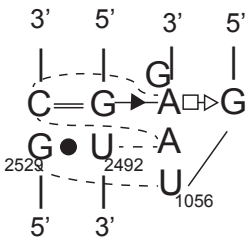

1VQO:1055-1059

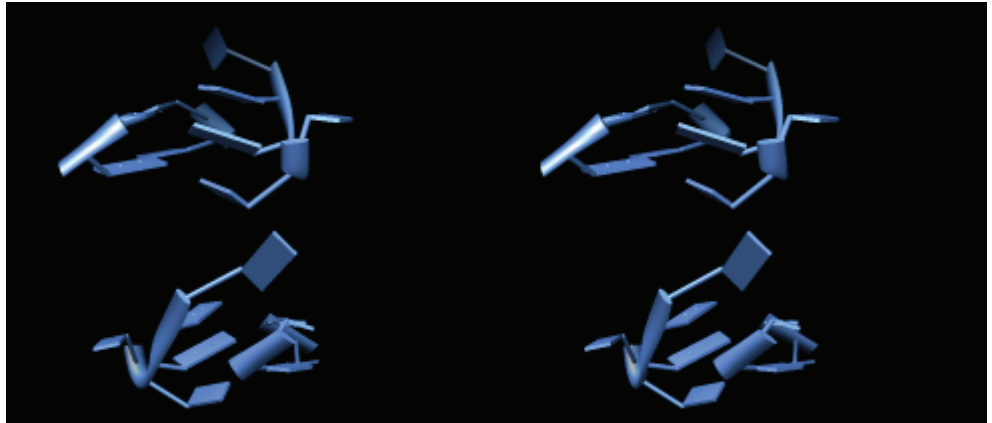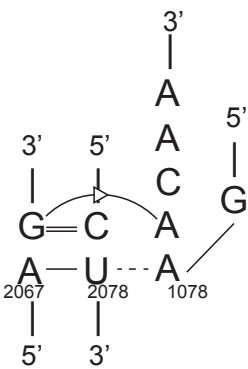

1VQO:1077-1082

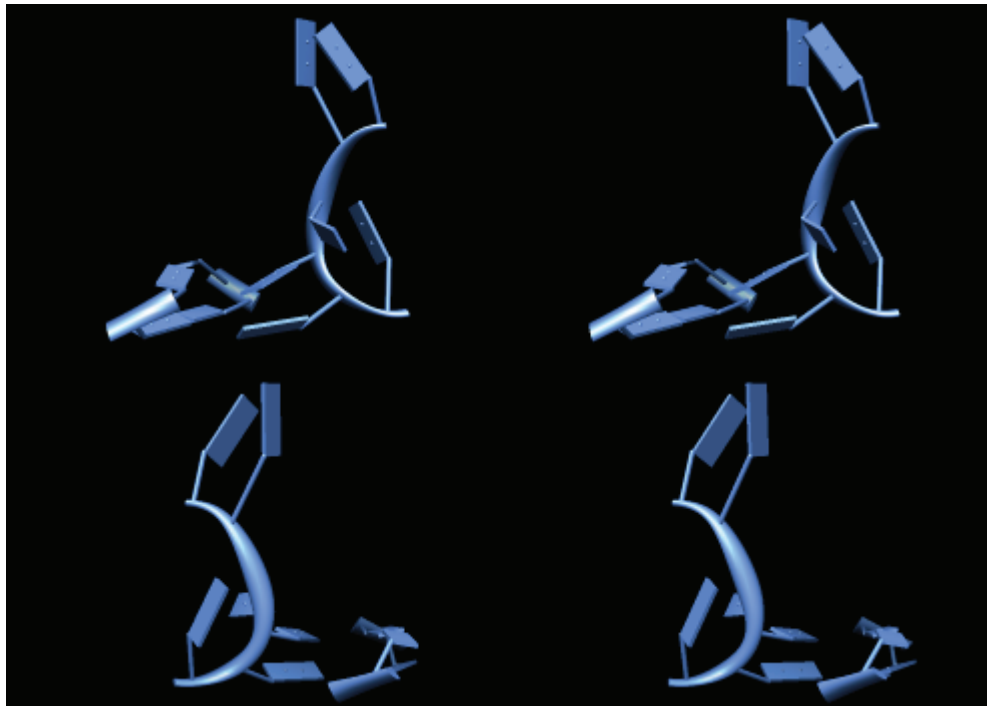

# B1 (Pt5 #4)

Class II/Subclass1 (NTL)

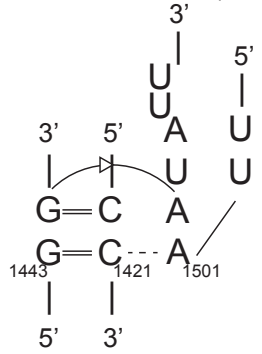

1VQO:1499-1506

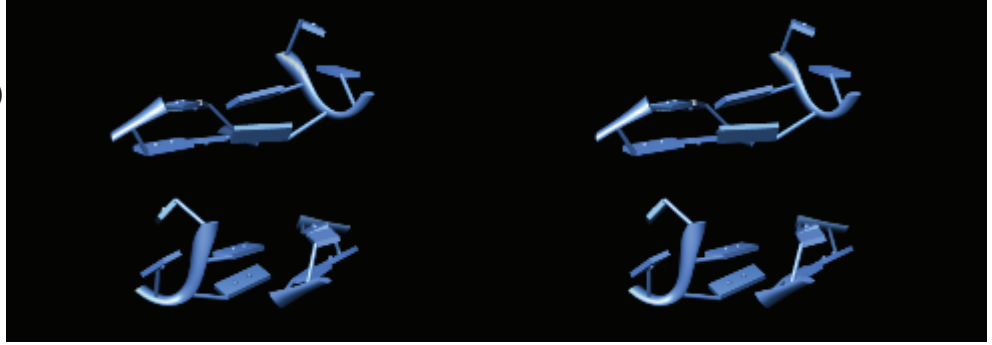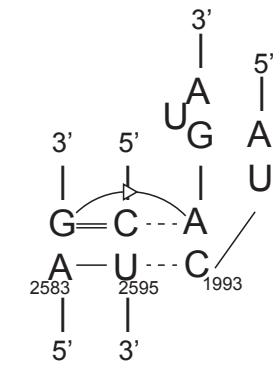

1VQO:1991-1997

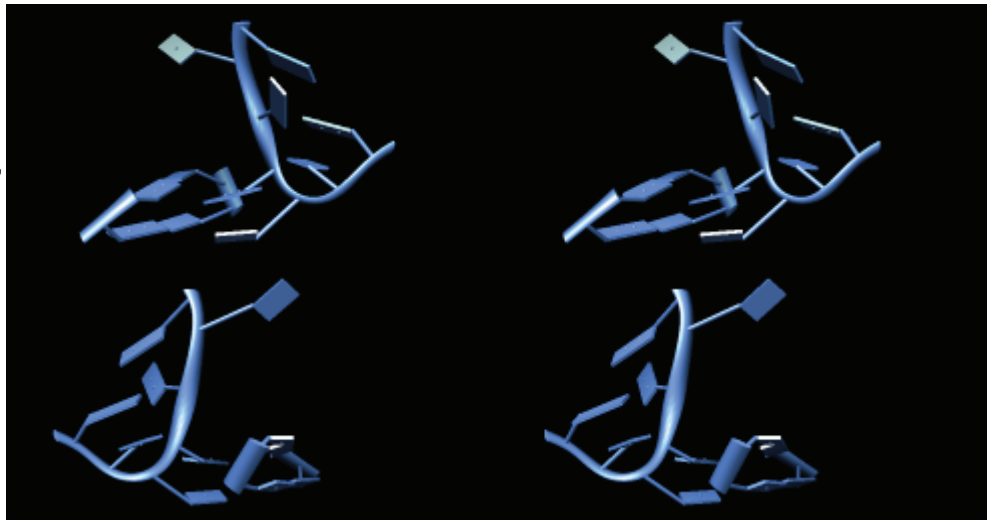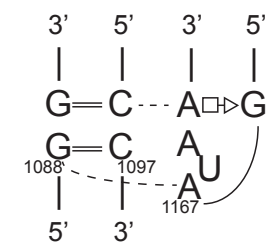

3OFO:1166-1170

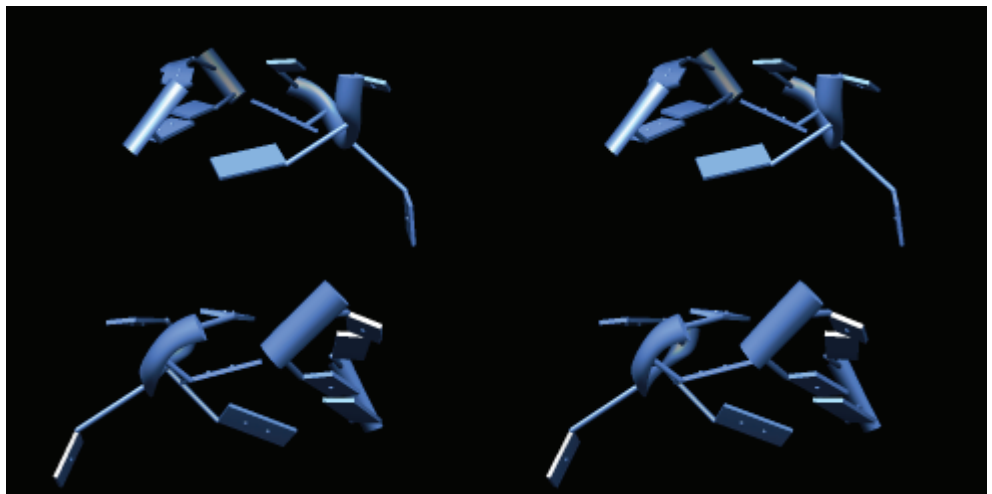

# B1 (Pt5 #5)

Class II/Subclass1 (NTL)

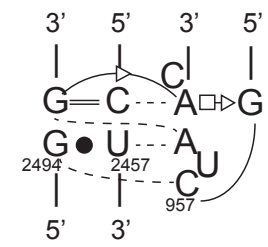

3OFR:956-961

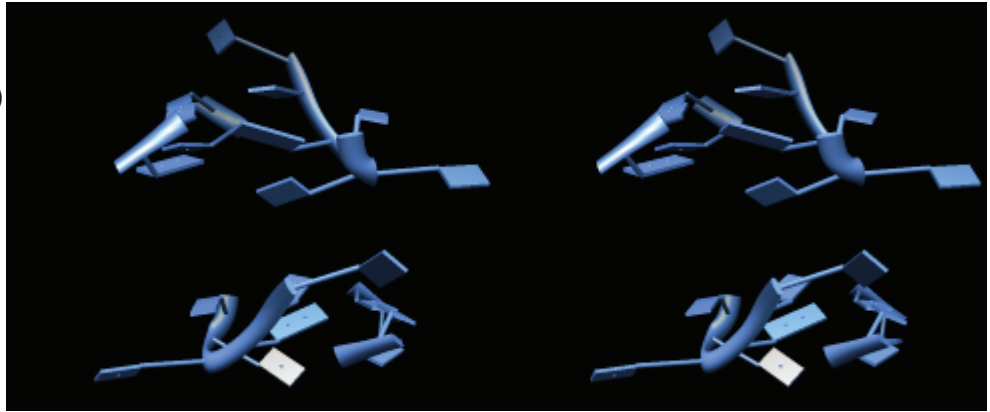

# B2(#1)

Class II/Subclass 2

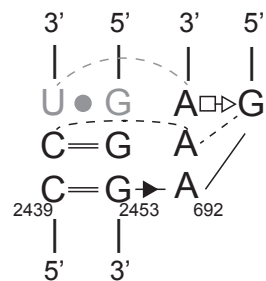

1VQO:691-694

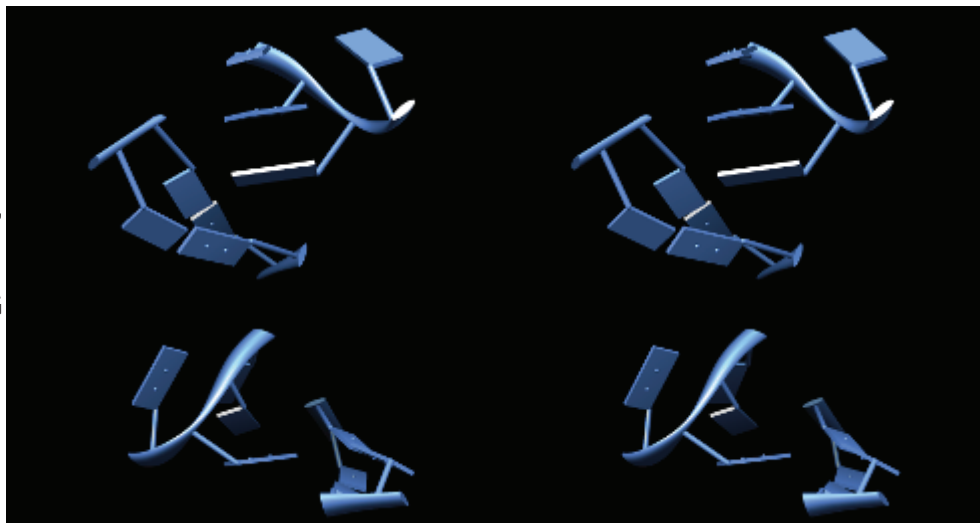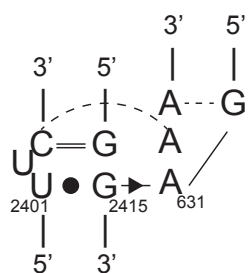

3OFR:630-633

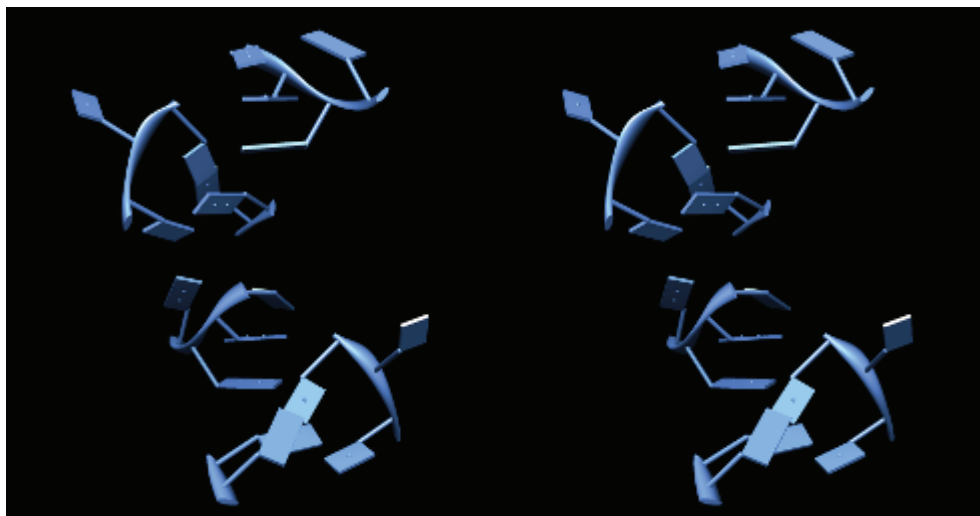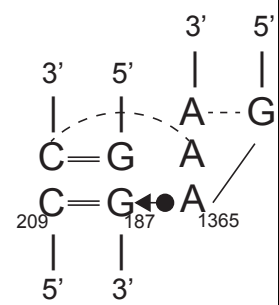

3OFR:1364-1367

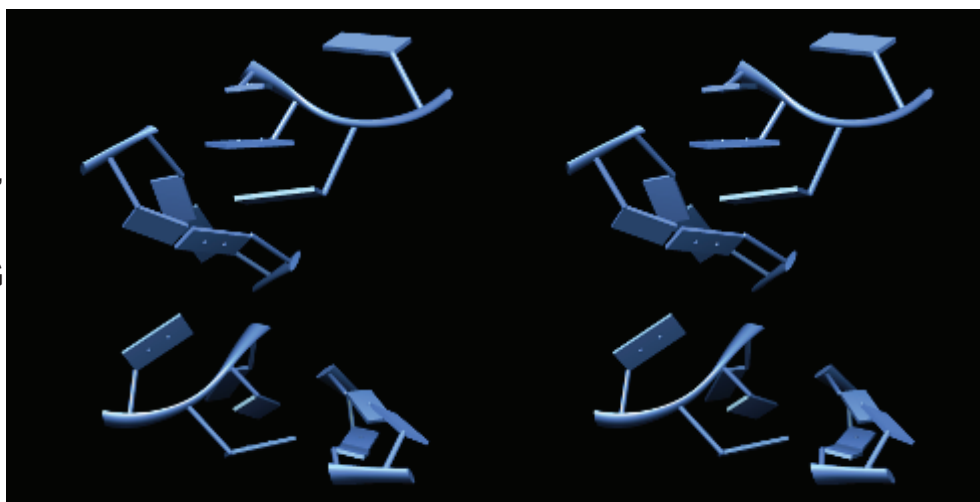

# B2 (#2)

Class II/Subclass 2  
(NTL)

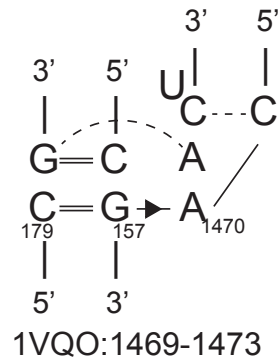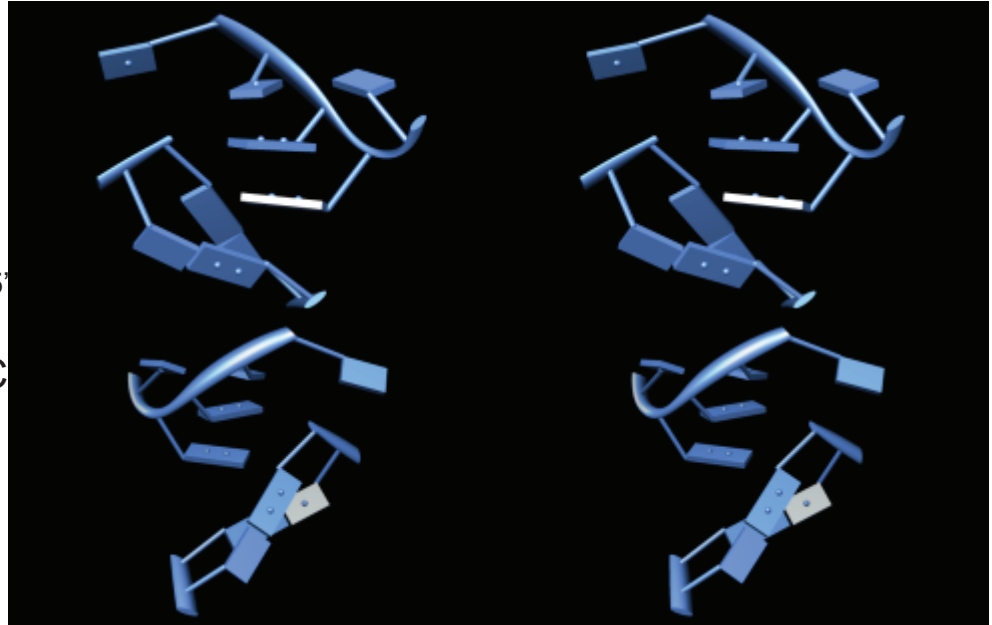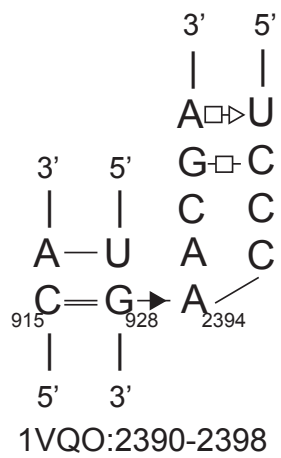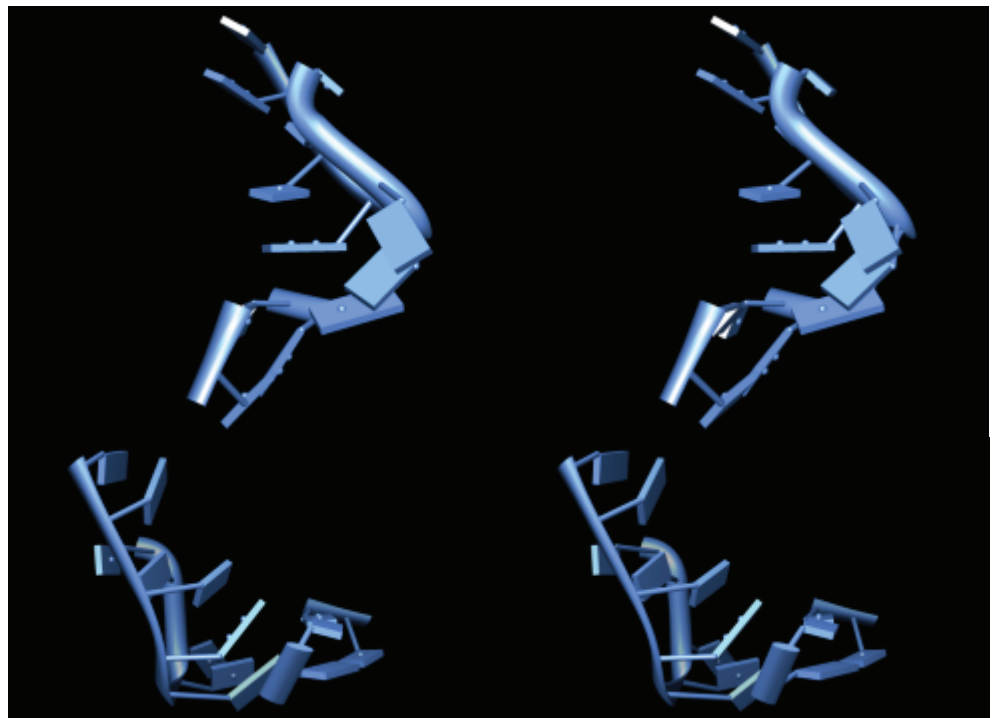

# B3

Class II/Subclass 3

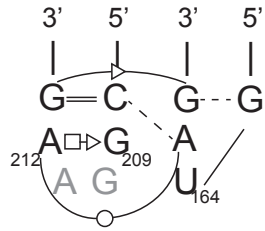

1LNG:163-166

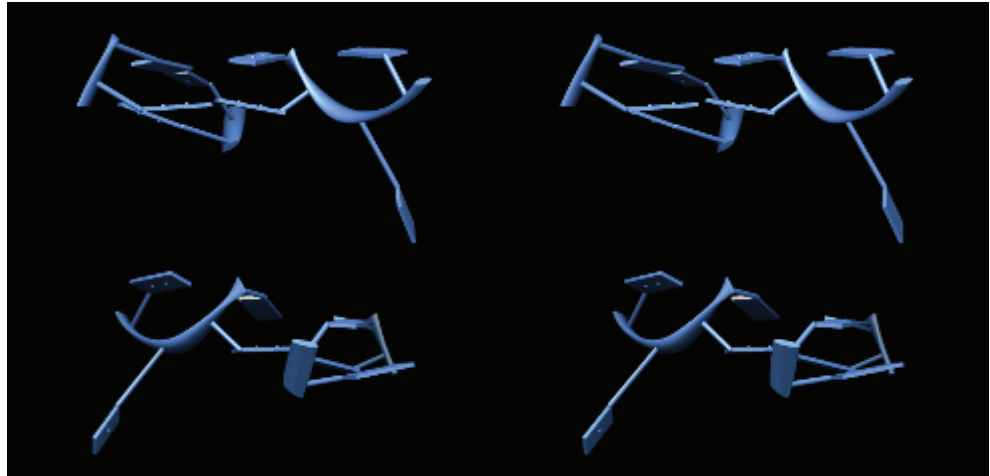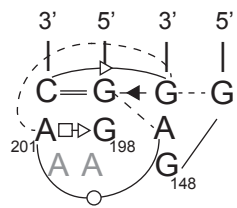

1MFQ:147-150

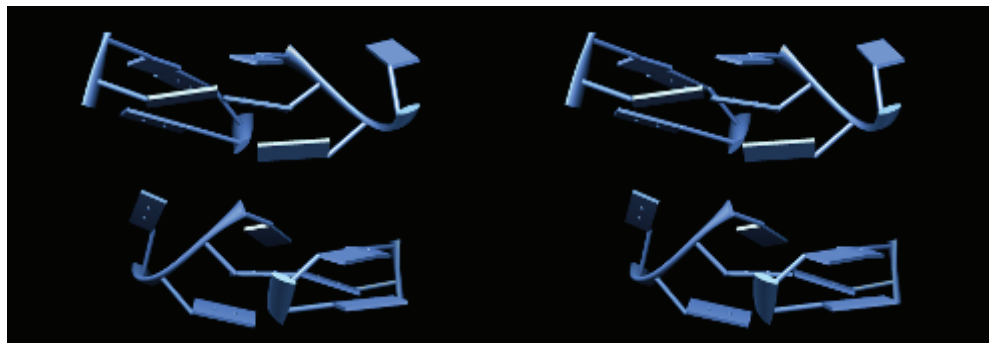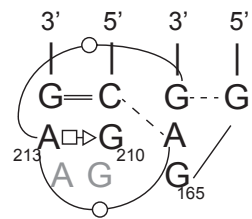

3KTW:164-167

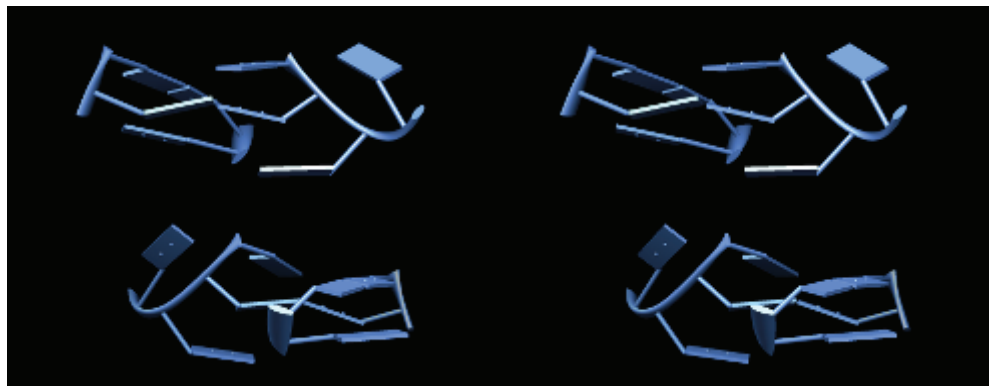

Class II/Subclass 3  
(NTL)

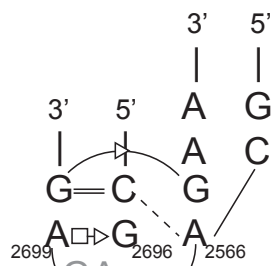

1VQO:2564-2569

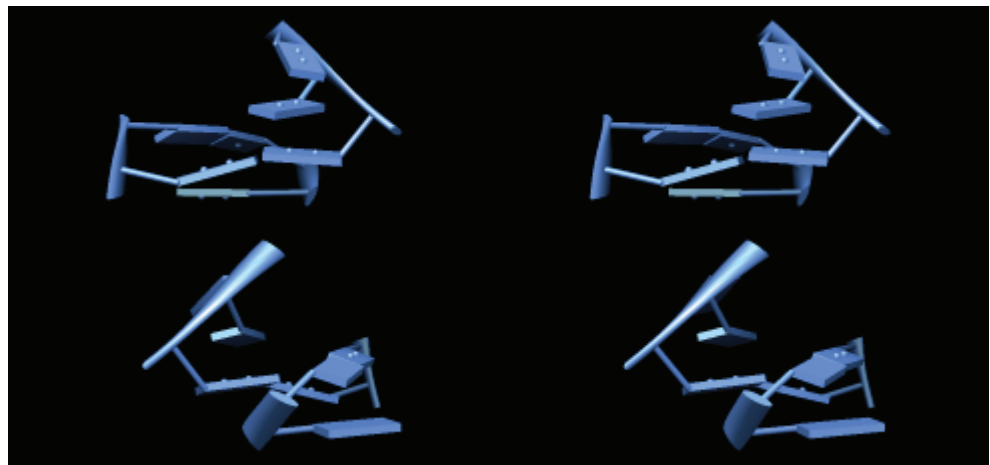



# B4

Class II/Subclass 4

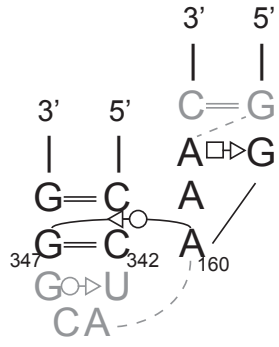

3OFO:159-162

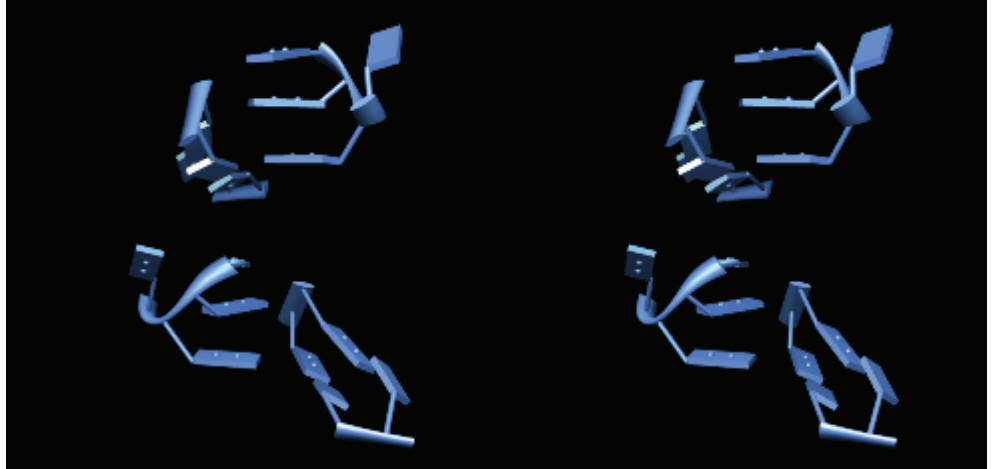

Class II/Subclass 4  
(NTL)

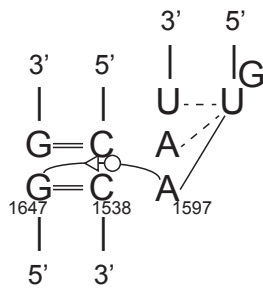

1VQO:1595-1599

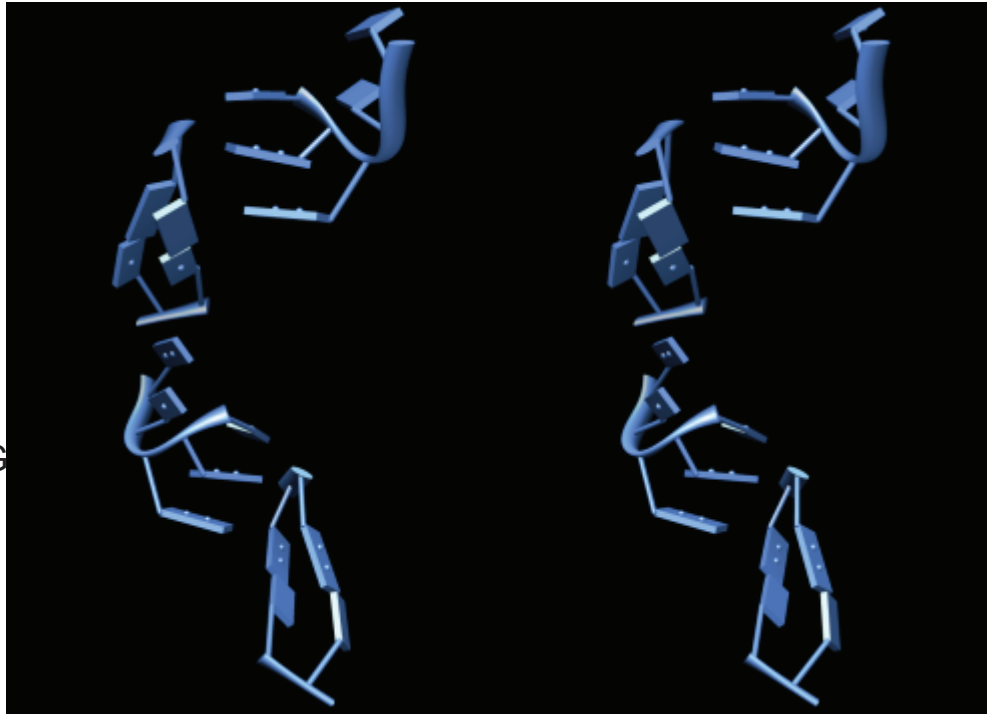

# B5

Class II/Subclass 5

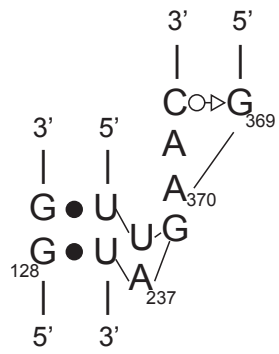

3IGI:369-372

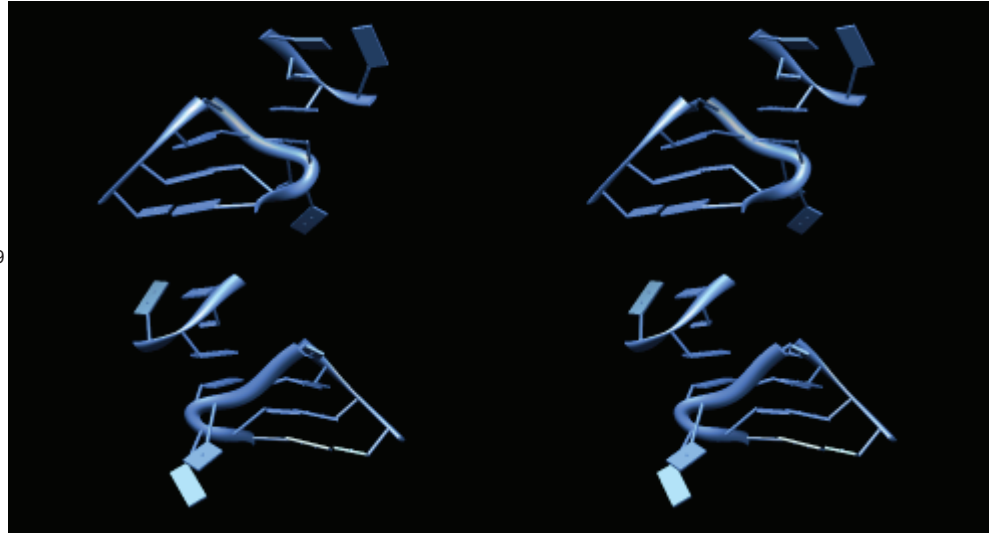

# C1

Class III/Subclass 1  
(NTL)

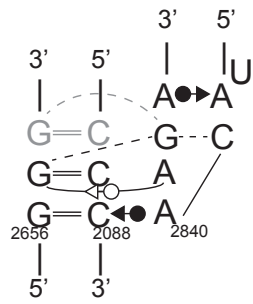

1VQO:2837-2843

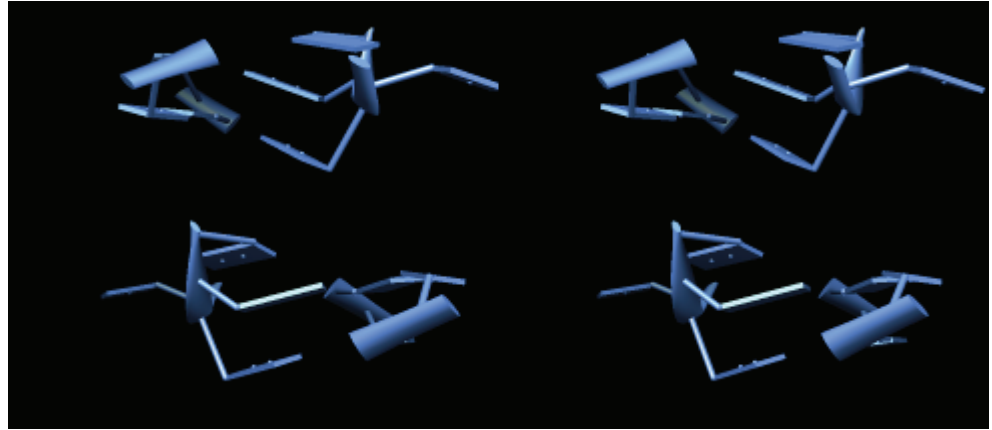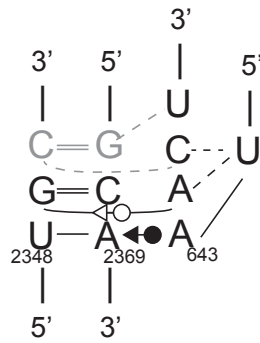

3OFR:642-646

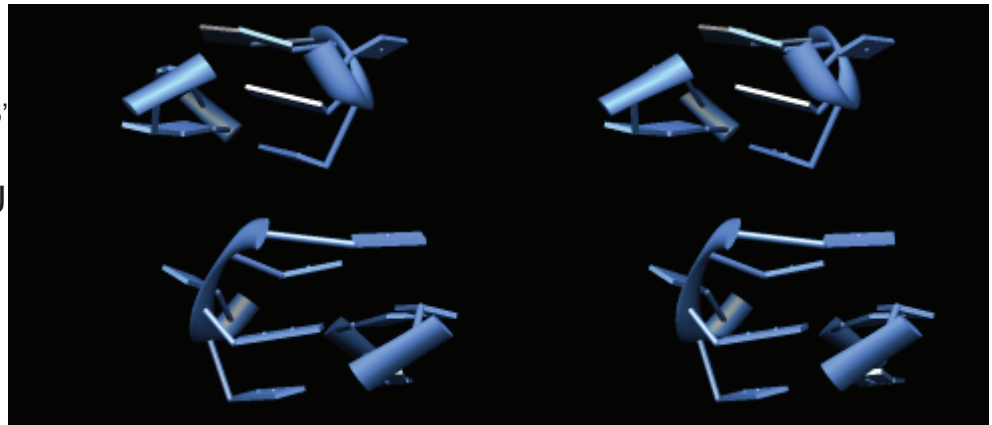

# C2

Class III/Individual  
(NTL)

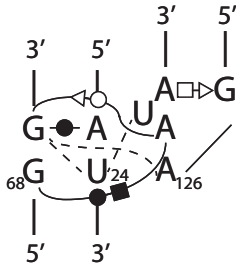

3DIL:125-129

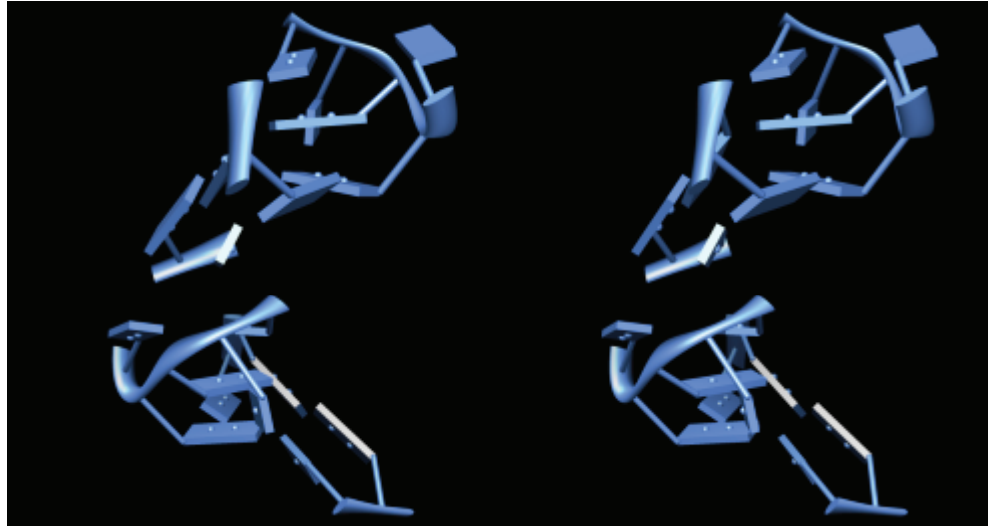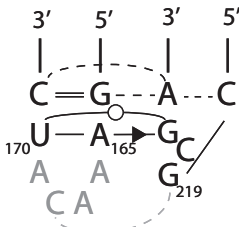

1VQO:218-222

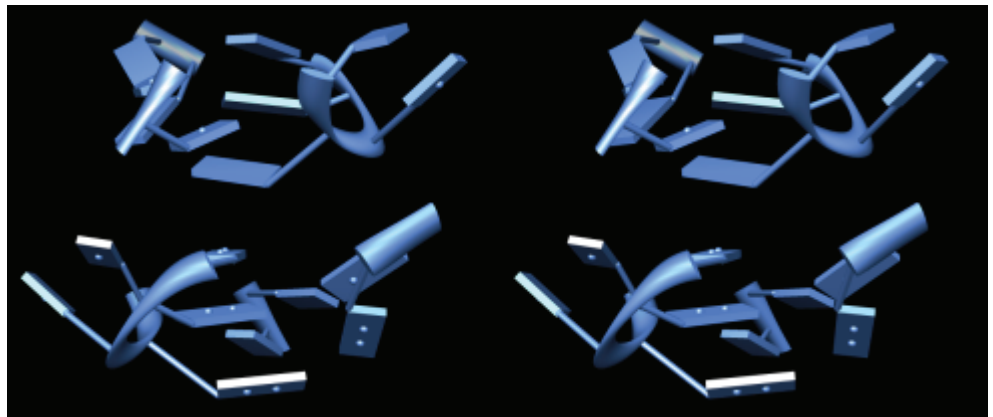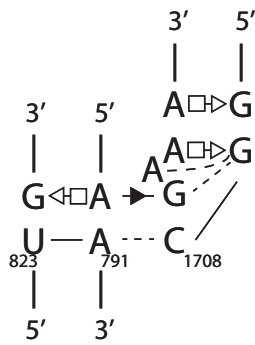

1VQO:1706-1712

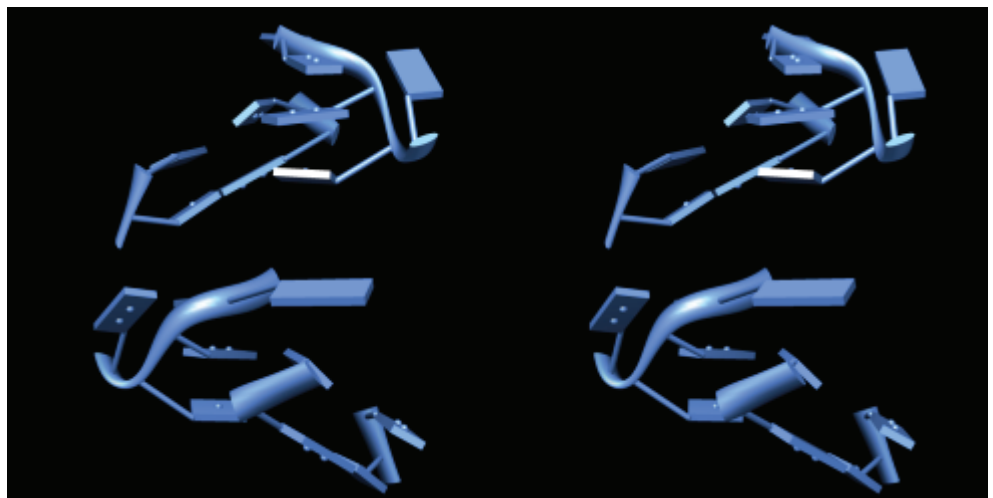

# D1

Class IV/Subclass 1  
(NTL)

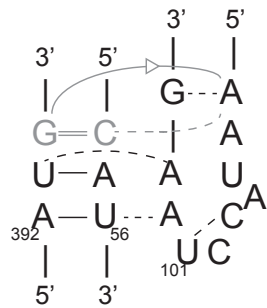

2A64:98-107

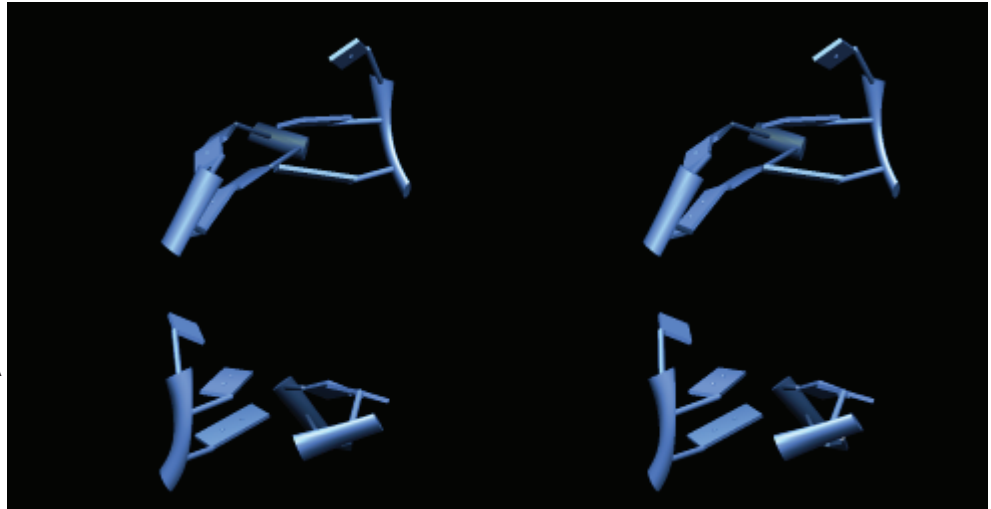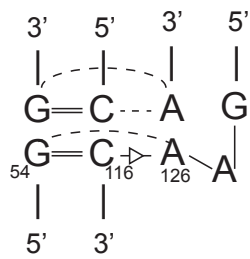

3OFR:124-127

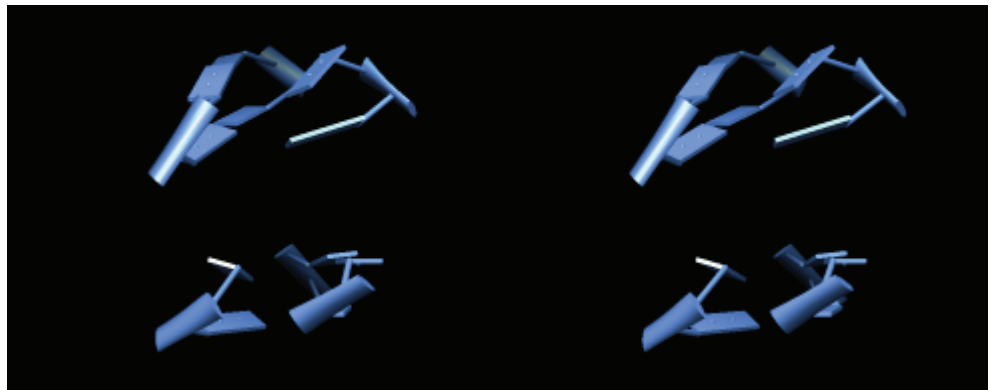

# D2

Class IV/Individual  
(NTL)

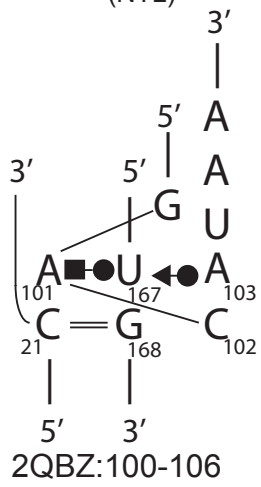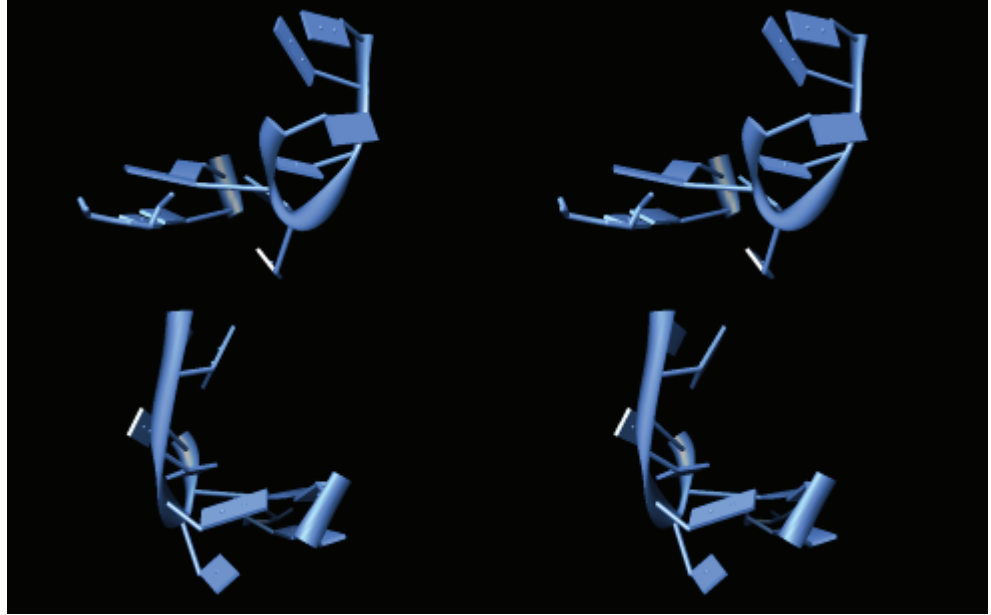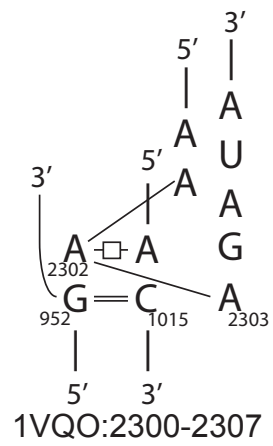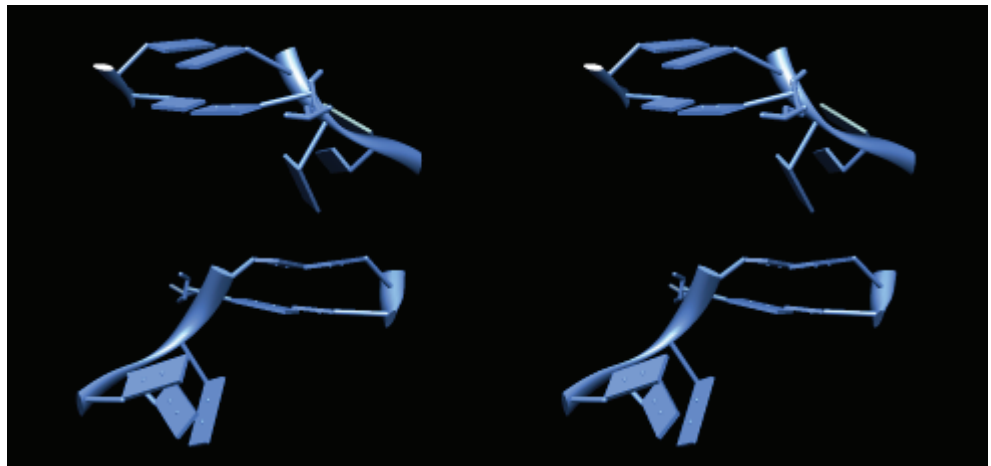

# D3

Class IV/Individual  
(NTL)

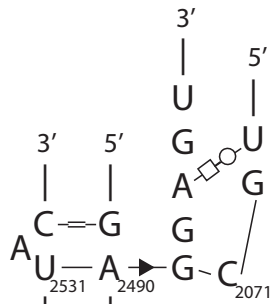

1VQO:2069-2076

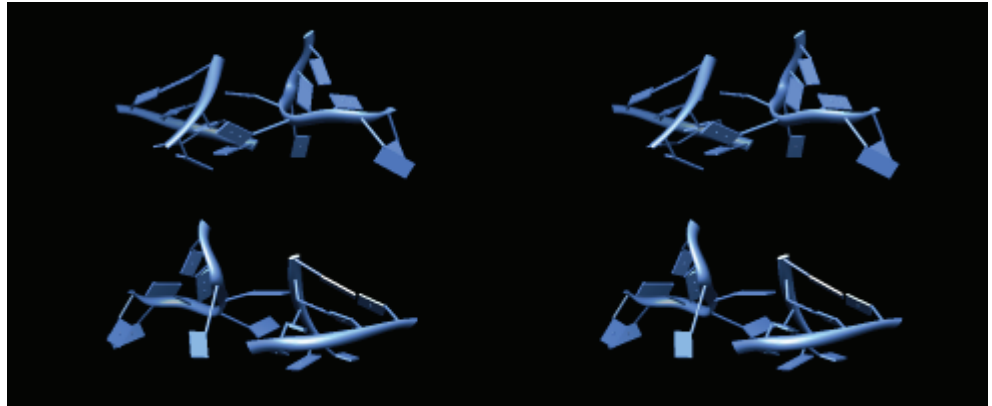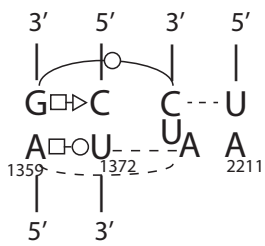

3OFR:2210-2214

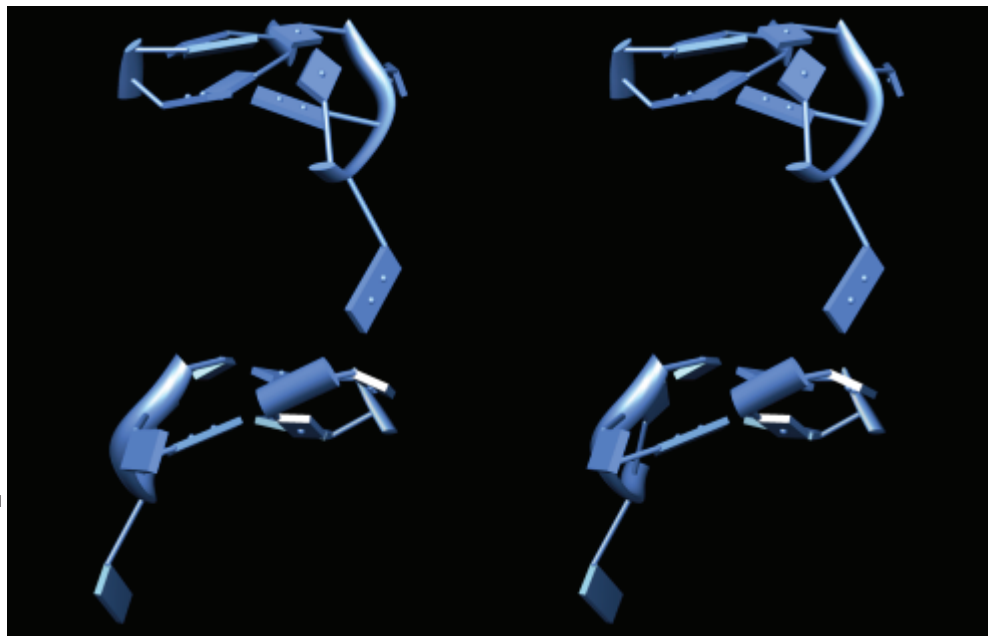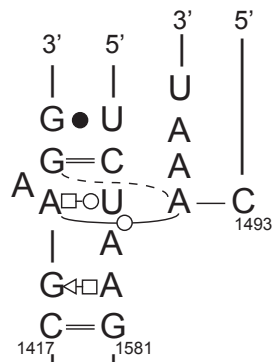

3OFR:1493-1497

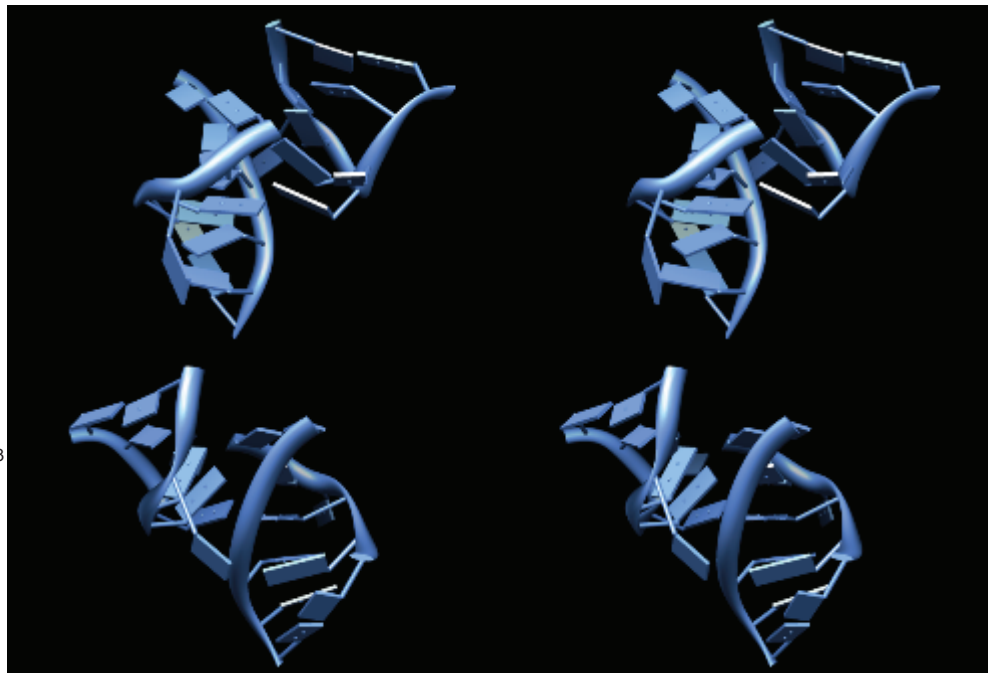



# D4(#1)

Class IV/Individual  
(NTL)

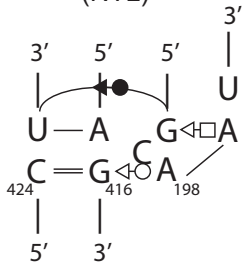

1VQO:196-200

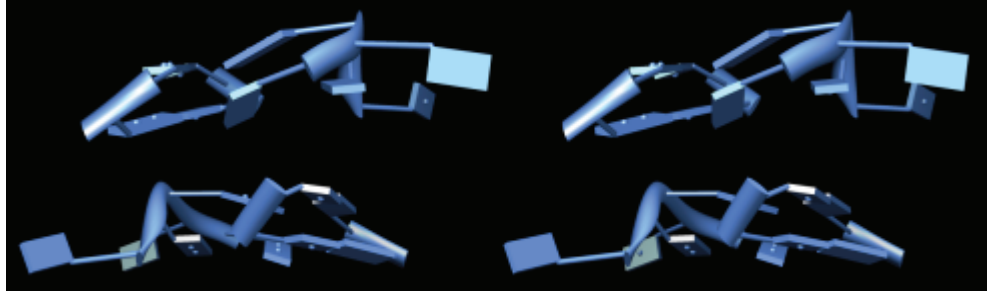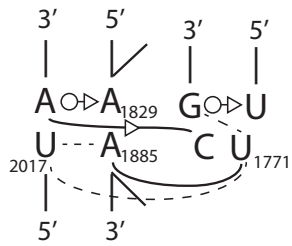

1VQO:1770-1773

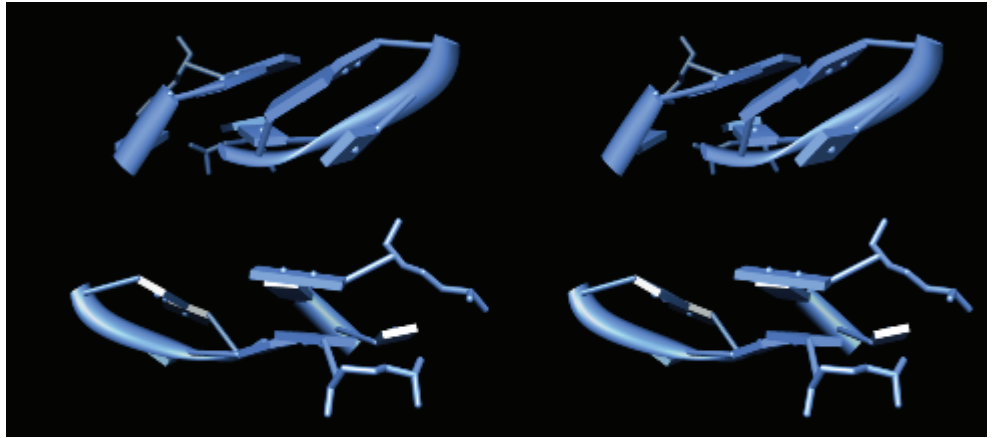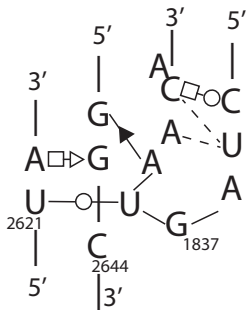

1VQO:1834-1842

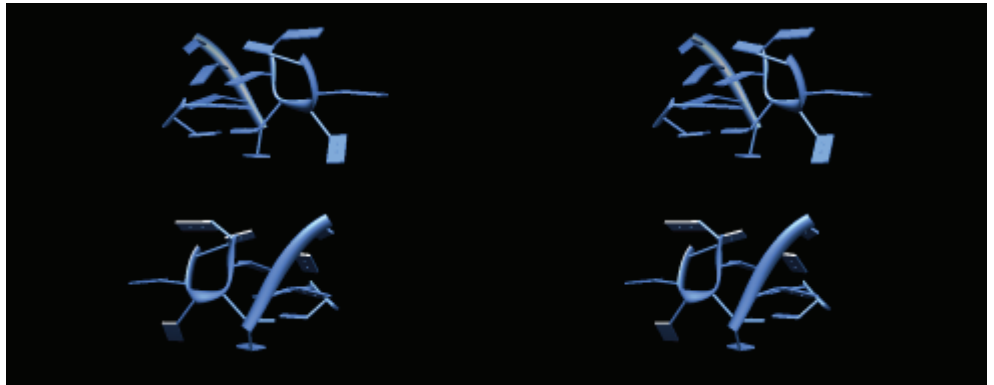

# D4(#2)

Class IV/Individual  
(NTL)

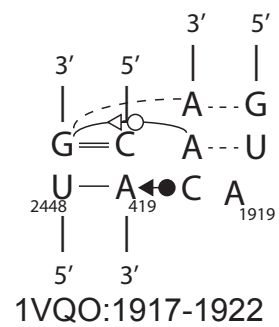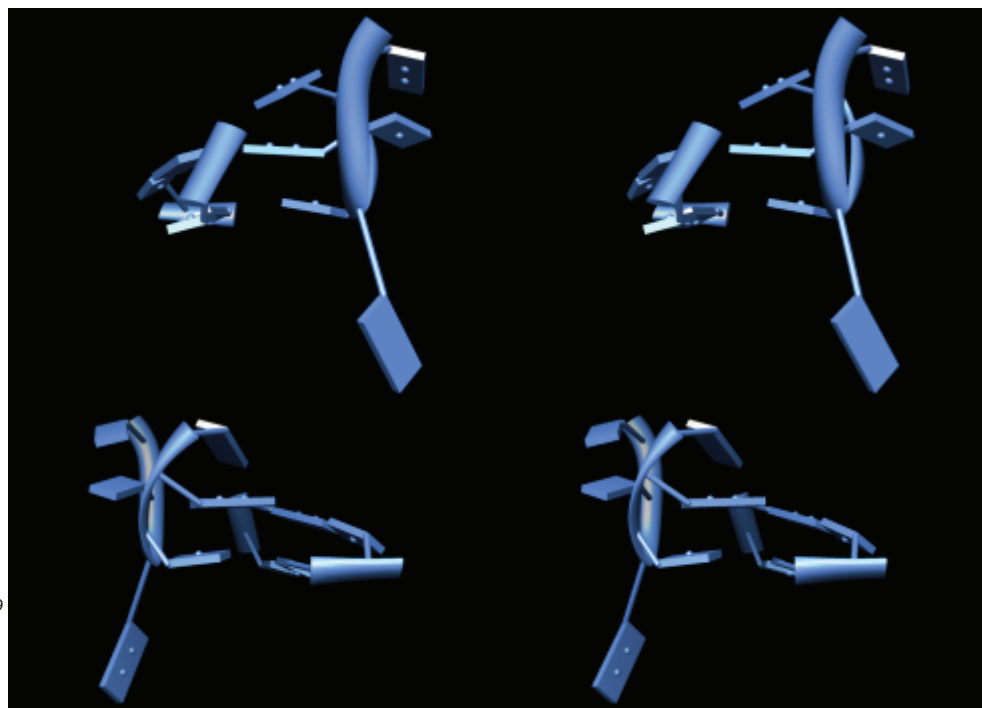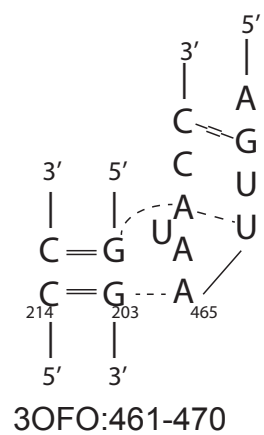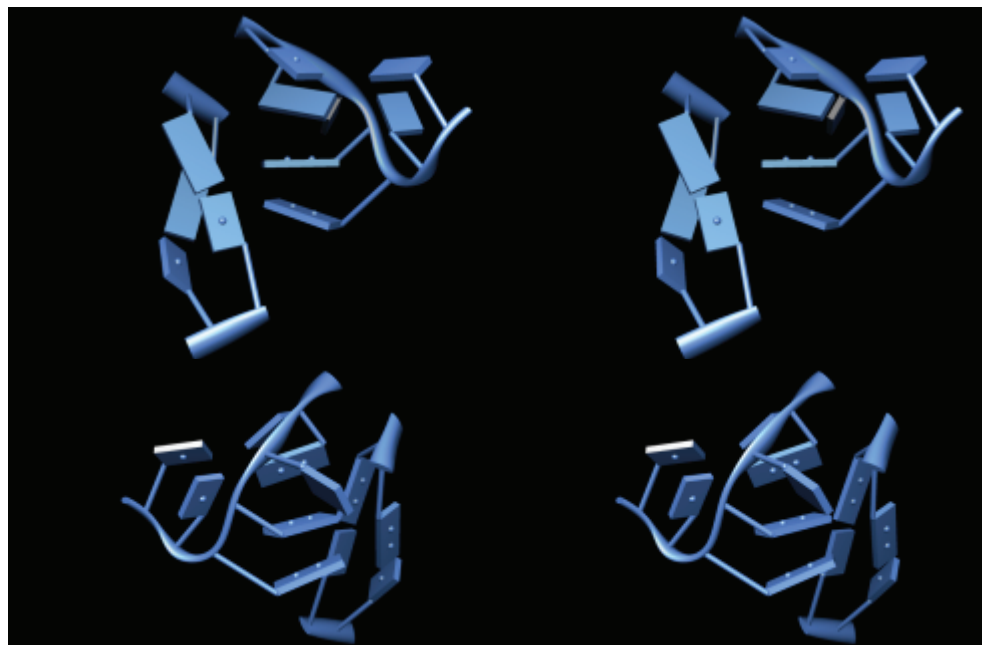

# D4(#3)

Class IV/Individual  
(NTL)

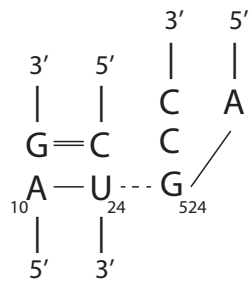

3OFO:523-526

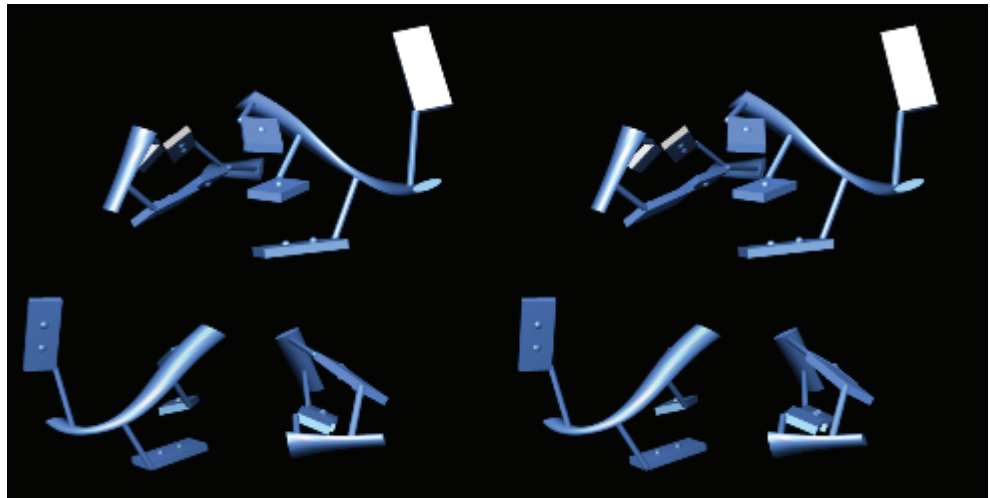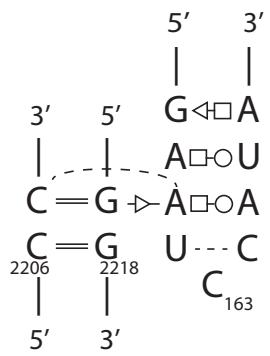

3OFR:159-167

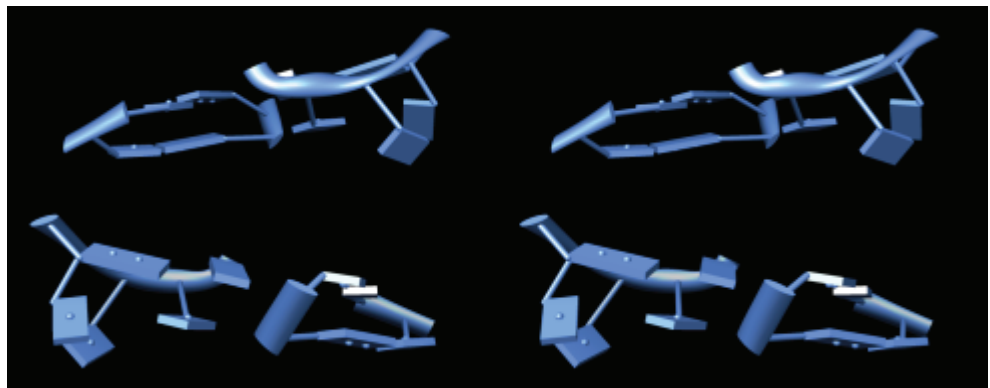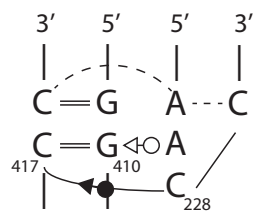

3OFR:226-229

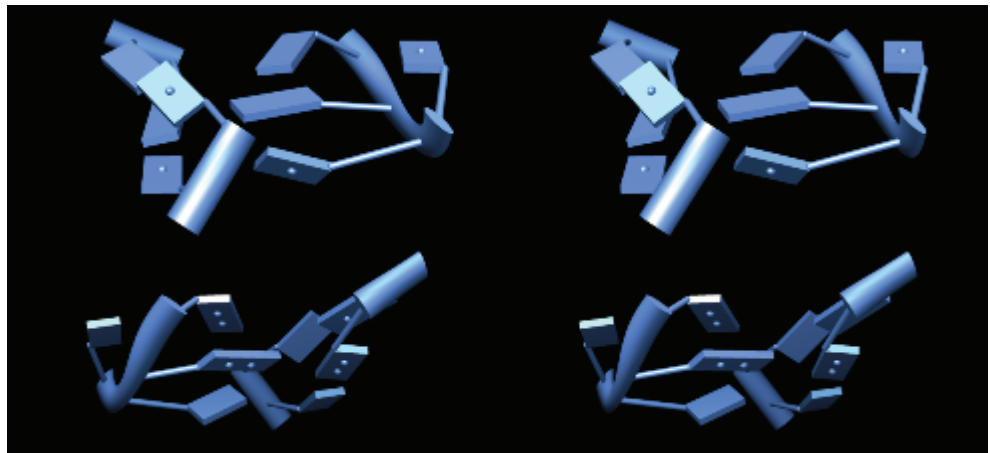

# D4(#3)

Class IV/Individual  
(NTL)

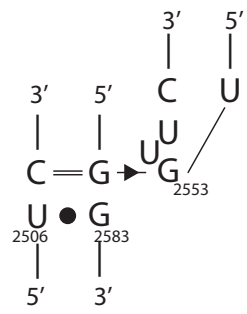

3OFR:2552-2556

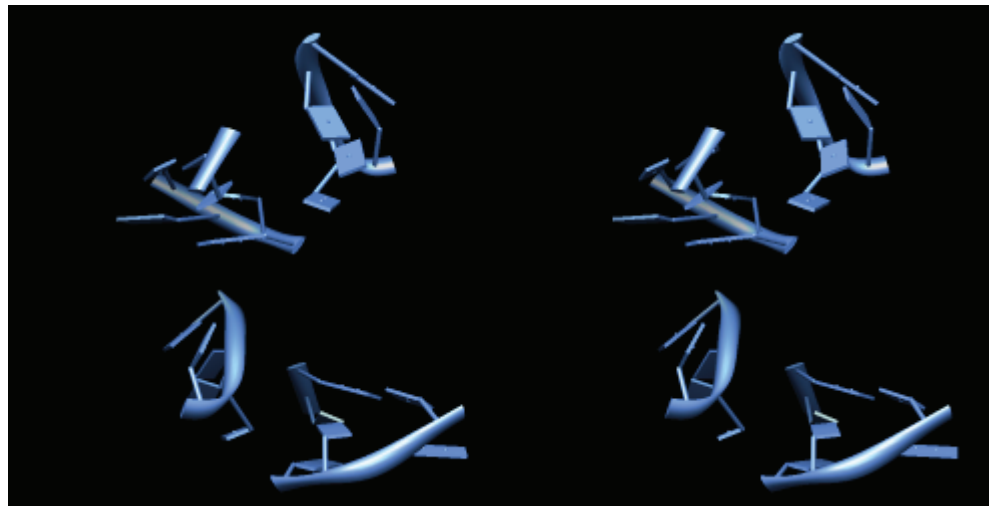

# D5(#1)

Class IV/Individual  
(NTL)

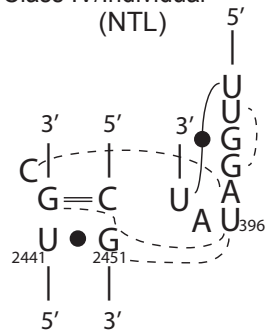

1VQO:391-398

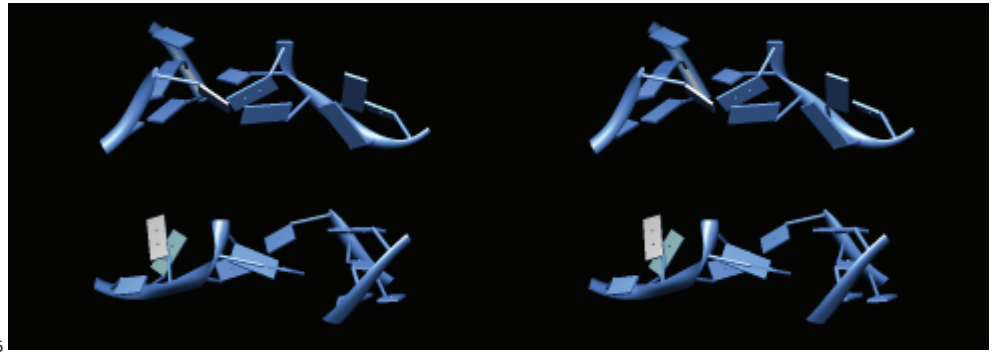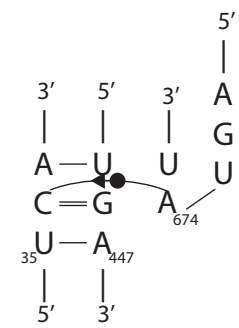

1VQO:671-675

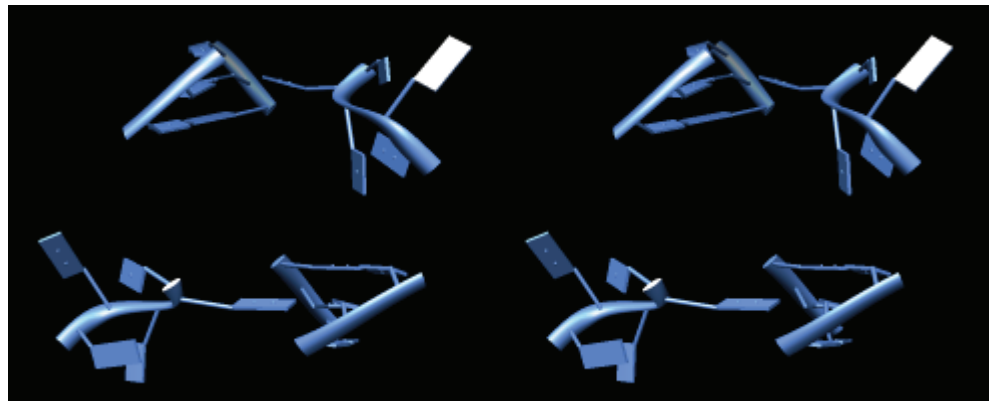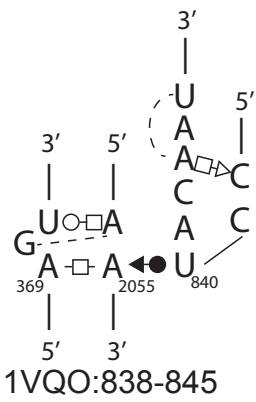

1VQO:838-845

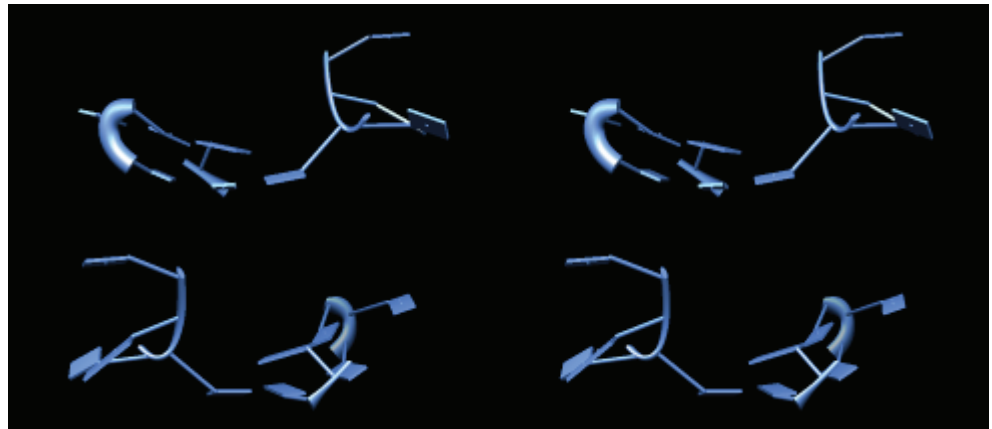

# D5(#2)

Class IV/Individual  
(NTL)

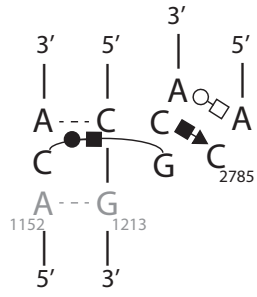

1VQO:2784-2788

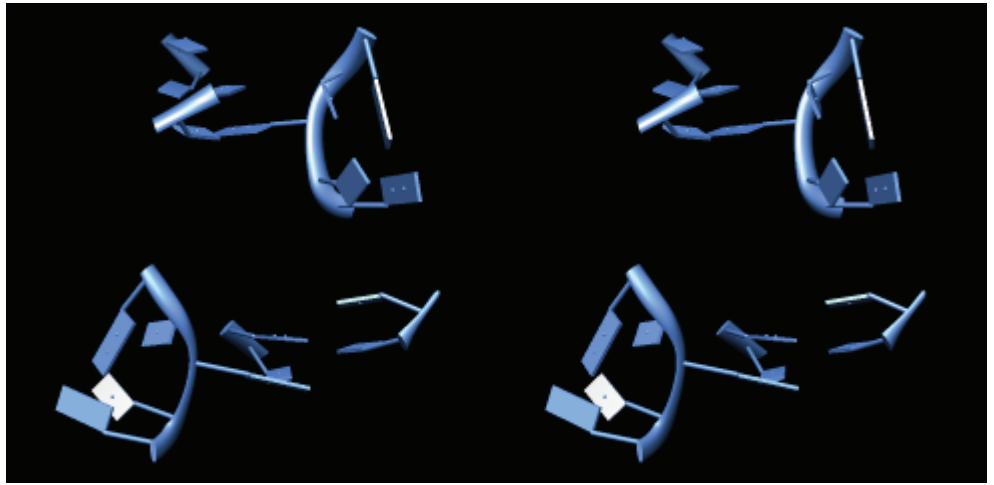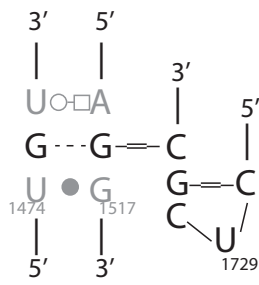

3OFR:1728-1732

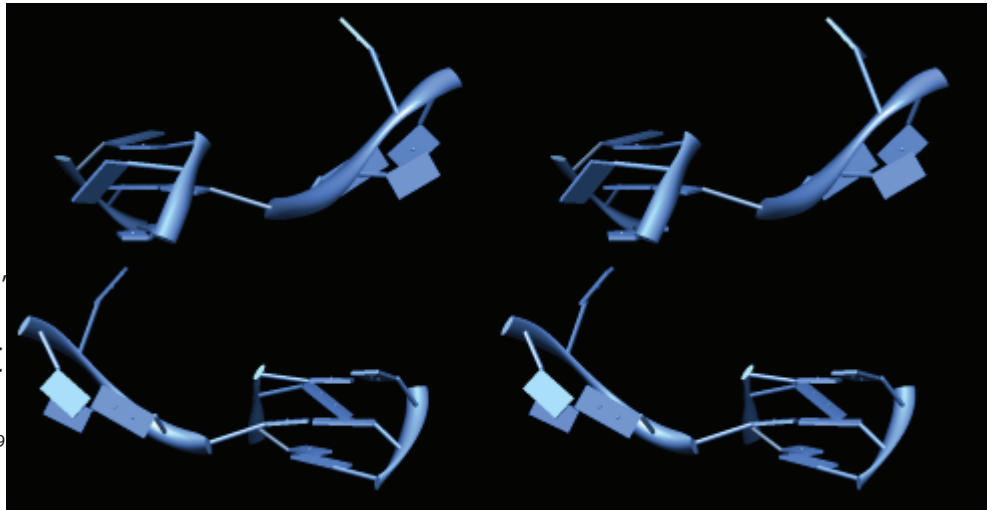

Supplement: pone.0049225.s001.pdf [file pone.0049225.s001.pdf]
